# Supplementary material for: PYTA: a universal chelator for advancing the theranostic palette of nuclear medicine
Source: Royal Society of Chemistry journal article supplement (doi:10.1039/d3sc06854d), 2024-01-01
Supplement: d3sc06854d1.pdf [file d3sc06854d1.pdf]

## PYTA: A Universal Chelator for Advancing the Theranostic Palette of Nuclear Medicine

Megan E. Simms,<sup>a,†‡</sup> Zhiyao Li,<sup>b,c,‡</sup> Megan M. Sibley,<sup>a</sup> Alexander S. Ivanov,<sup>a</sup> Caroline M. Lara,<sup>d</sup> Timothy C. Johnstone,<sup>e</sup> Vilmos Kertesz,<sup>f</sup> Amanda Fears,<sup>b,c</sup> Frankie D. White,<sup>g,\*</sup> Daniel L. J. Thorek,<sup>b,c,h,i,\*</sup> Nikki A. Thiele<sup>a,\*</sup>

<sup>a</sup>Chemical Sciences Division, Oak Ridge National Laboratory, Oak Ridge, TN 37831, United States.  
E-mail: [thielena@ornl.gov](mailto:thielena@ornl.gov)

<sup>b</sup>Department of Radiology, Washington University in St. Louis School of Medicine, St. Louis, MO 63110, United States. E-mail: [thorekd@wustl.edu](mailto:thorekd@wustl.edu)

<sup>c</sup>Program in Quantitative Molecular Therapeutics, Washington University in St. Louis School of Medicine, St. Louis, MO 63110, United States

<sup>d</sup>Department of Biological Sciences, University of Notre Dame, Notre Dame, IN 46556, United States

<sup>e</sup>Department of Chemistry and Biochemistry, University of California Santa Cruz, Santa Cruz, CA 95064, United States

<sup>f</sup>Biosciences Division, Oak Ridge National Laboratory, Oak Ridge, TN 37831, United States

<sup>g</sup>Radioisotope Science and Technology Division, Oak Ridge National Laboratory, Oak Ridge, TN 37831, United States. E-mail: [whitefd@ornl.gov](mailto:whitefd@ornl.gov)

<sup>h</sup>Department of Biomedical Engineering, Washington University in St. Louis, St. Louis, MO 63110, United States

<sup>i</sup>Oncologic Imaging Program, Siteman Cancer Center, Washington University in St. Louis School of Medicine, St. Louis, MO 63110, United States

<sup>‡</sup>These authors contributed equally

\*E-mail: [thielena@ornl.gov](mailto:thielena@ornl.gov), [thorekd@wustl.edu](mailto:thorekd@wustl.edu), [whitefd@ornl.gov](mailto:whitefd@ornl.gov)

## TABLE OF CONTENTS

|                                                           | <u>page</u> |
|-----------------------------------------------------------|-------------|
| <b>1. General Materials and Methods</b> .....             | 7           |
| <b>2. Computational Chemistry</b> .....                   | 7           |
| <b>3. Solution-State Chemistry</b> .....                  | 8           |
| <b>4. Solid-State Chemistry</b> .....                     | 9           |
| 4.1 Synthesis of In–PYTA complex.....                     | 9           |
| 4.2 Synthesis of Sc–PYTA complex.....                     | 9           |
| 4.3 Synthesis of Cu–PYTA complex .....                    | 9           |
| 4.4 X-ray diffraction and refinement .....                | 9           |
| <b>5. Radionuclides</b> .....                             | 10          |
| 5.1 Sourcing and solution preparation .....               | 10          |
| 5.2 Gamma spectroscopy .....                              | 11          |
| <b>6. Radiolabeling and Serum Stability Studies</b> ..... | 11          |
| 6.1 General .....                                         | 11          |
| 6.2 Concentration-dependent radiolabeling .....           | 12          |
| 6.3 Serum challenges .....                                | 12          |
| <b>7. PET Imaging and Ex Vivo Biodistribution</b> .....   | 13          |
| 7.1 General .....                                         | 13          |
| 7.2 <sup>225</sup> Ac studies .....                       | 13          |
| 7.3 <sup>44</sup> Sc studies .....                        | 13          |
| <b>8. Supporting Figures, Tables, and Schemes</b> .....   | 14          |
| <b>9. References</b> .....                                | 39          |
| <b>10. Appendices</b> .....                               | 40          |
| A. Chelator characterization data .....                   | 40          |
| B. HPGe gamma-ray spectra.....                            | 44          |



## LIST OF TABLES

| <u>Table</u>                                                                                                                                                                                                                                                                                     | <u>page</u> |
|--------------------------------------------------------------------------------------------------------------------------------------------------------------------------------------------------------------------------------------------------------------------------------------------------|-------------|
| <b>Table S1.</b> Summary of selected structural parameters for [La(H <sub>2</sub> PYTA)](NO <sub>3</sub> )·3H <sub>2</sub> O and [Ac(H <sub>2</sub> PYTA)](NO <sub>3</sub> )·3H <sub>2</sub> O obtained from DFT periodic structure calculations.....                                            | 14          |
| <b>Table S2.</b> X-ray crystallographic data collection and refinement parameters for [In(H <sub>2</sub> PYTA)]ClO <sub>4</sub> , [Sc(HPYTA)]·3H <sub>2</sub> O, and [Cu(H <sub>2</sub> PYTA)]·4H <sub>2</sub> O.....                                                                            | 20          |
| <b>Table S3.</b> TLC systems and retention factors (R <sub>f</sub> ) for radiolabeling experiments of PYTA, macropa, and DOTA with <sup>225</sup> Ac <sup>3+</sup> , [ <sup>177</sup> Lu]Lu <sup>3+</sup> , [ <sup>111</sup> In]In <sup>3+</sup> , and [ <sup>44</sup> Sc]Sc <sup>3+</sup> ..... | 21          |
| <b>Table S4.</b> TLC systems and chelator concentrations used in serum challenges.....                                                                                                                                                                                                           | 29          |
| <b>Table S5.</b> Organ distribution of [ <sup>44</sup> Sc]Sc–PYTA after intravenous injection in mice (%ID/g). ..                                                                                                                                                                                | 37          |
| <b>Table S6.</b> Organ distribution of <sup>225</sup> Ac–PYTA after intravenous injection in mice (%ID/g).....                                                                                                                                                                                   | 38          |

## LIST OF FIGURES

| <u>Figure</u>                                                                                                                                                                                 | <u>page</u> |
|-----------------------------------------------------------------------------------------------------------------------------------------------------------------------------------------------|-------------|
| Figure S1. Chelators mentioned in the main text.....                                                                                                                                          | 14          |
| Figure S2. Structural parameters of the [La(PYTA)] <sup>-</sup> and [Ac(PYTA)] <sup>-</sup> complexes in aqueous solution obtained from ab initio molecular dynamics (AIMD) simulations ..... | 15          |
| Figure S3. ESI-HRMS of La–PYTA.....                                                                                                                                                           | 16          |
| Figure S4. ESI-HRMS of Lu–PYTA .....                                                                                                                                                          | 16          |
| Figure S5. ESI-HRMS of Sc–PYTA. ....                                                                                                                                                          | 17          |
| Figure S6. ESI-HRMS of In–PYTA .....                                                                                                                                                          | 17          |
| Figure S7. <sup>1</sup> H NMR spectra of metal–PYTA complexes.....                                                                                                                            | 18          |
| Figure S8. Variable temperature <sup>1</sup> H NMR spectra of In–PYTA .....                                                                                                                   | 19          |
| Figure S9. X-ray crystal structure of the Cu <sup>2+</sup> complex of PYTA.....                                                                                                               | 20          |
| Figure S10. Representative radio-TLC traces from <sup>225</sup> Ac <sup>3+</sup> radiolabeling of PYTA using TLC system A .....                                                               | 21          |
| Figure S11. Representative radio-TLC traces from <sup>225</sup> Ac <sup>3+</sup> radiolabeling of macropa using TLC system A .....                                                            | 21          |
| Figure S12. Representative radio-TLC traces from <sup>225</sup> Ac <sup>3+</sup> radiolabeling of DOTA using TLC system B.....                                                                | 22          |
| Figure S13. Representative radio-TLC traces from [ <sup>177</sup> Lu]Lu <sup>3+</sup> radiolabeling of PYTA using TLC system B.....                                                           | 22          |
| Figure S14. Representative radio-TLC traces from [ <sup>177</sup> Lu]Lu <sup>3+</sup> radiolabeling of macropa using TLC system A.....                                                        | 22          |
| Figure S15. Representative radio-TLC traces from [ <sup>177</sup> Lu]Lu <sup>3+</sup> radiolabeling of DOTA using TLC system B.....                                                           | 23          |
| Figure S16. Representative radio-TLC traces from [ <sup>111</sup> In]In <sup>3+</sup> radiolabeling of PYTA using TLC system B.....                                                           | 23          |
| Figure S17. Representative radio-TLC traces from [ <sup>111</sup> In]In <sup>3+</sup> radiolabeling of macropa using TLC system B.....                                                        | 24          |

|                                                                                                                                                                                                                                                                                                                 |    |
|-----------------------------------------------------------------------------------------------------------------------------------------------------------------------------------------------------------------------------------------------------------------------------------------------------------------|----|
| Figure S18. Representative radio-TLC traces from [ $^{111}\text{In}$ ]In $^{3+}$ radiolabeling of DOTA using TLC system B.....                                                                                                                                                                                  | 24 |
| Figure S19. Representative radio-TLC traces from [ $^{44}\text{Sc}$ ]Sc $^{3+}$ radiolabeling with PYTA using TLC system C .....                                                                                                                                                                                | 25 |
| Figure S20. Representative radio-TLC traces from [ $^{44}\text{Sc}$ ]Sc $^{3+}$ radiolabeling with PYTA using TLC system C .....                                                                                                                                                                                | 25 |
| Figure S21. Representative radio-TLC traces from [ $^{44}\text{Sc}$ ]Sc $^{3+}$ radiolabeling with macropa using TLC system D .....                                                                                                                                                                             | 26 |
| Figure S22. Representative radio-TLC traces from [ $^{44}\text{Sc}$ ]Sc $^{3+}$ radiolabeling with DOTA (various concentrations) using TLC system E.....                                                                                                                                                        | 26 |
| Figure S23. Representative radio-TLC traces from [ $^{44}\text{Sc}$ ]Sc $^{3+}$ radiolabeling with DOTA using TLC system E.....                                                                                                                                                                                 | 27 |
| Figure S24. Concentration-dependent radiolabeling of PYTA, macropa, and DOTA with (a) $^{225}\text{Ac}^{3+}$ (9.3–11.1 kBq), (b) [ $^{177}\text{Lu}$ ]Lu $^{3+}$ (22–37 kBq), (c) [ $^{111}\text{In}$ ]In $^{3+}$ (74–111 kBq), or (d) [ $^{44}\text{Sc}$ ]Sc $^{3+}$ (185 kBq) after 60 min reaction time..... | 28 |
| Figure S25. Concentration-dependent radiolabeling of DOTA with $^{225}\text{Ac}^{3+}$ (9.3–11.1 kBq), [ $^{177}\text{Lu}$ ]Lu $^{3+}$ (22–37 kBq), and [ $^{111}\text{In}$ ]In $^{3+}$ (74–111 kBq) at 80 °C after (a) 5 min or (b) 60 min reaction time .....                                                  | 29 |
| Figure S26. Representative radio-TLC traces (TLC system B) from experiments challenging $^{225}\text{Ac}$ –PYTA with human serum.....                                                                                                                                                                           | 29 |
| Figure S27. Representative radio-TLC traces (TLC system A) from experiments challenging $^{225}\text{Ac}$ –macropa with human serum .....                                                                                                                                                                       | 30 |
| Figure S28. Representative radio-TLC traces (TLC system B) from experiments challenging $^{225}\text{Ac}$ –DOTA with human serum.....                                                                                                                                                                           | 30 |
| Figure S29. Representative radio-TLC traces (TLC system B) from experiments challenging [ $^{177}\text{Lu}$ ]Lu–PYTA with human serum .....                                                                                                                                                                     | 31 |
| Figure S30. Representative radio-TLC traces (TLC system A) from experiments challenging [ $^{177}\text{Lu}$ ]Lu–macropa with human serum .....                                                                                                                                                                  | 31 |
| Figure S31. Representative radio-TLC traces (TLC system B) from experiments challenging [ $^{177}\text{Lu}$ ]Lu–DOTA with human serum .....                                                                                                                                                                     | 32 |
| Figure S32. Representative radio-TLC traces (TLC system B) from experiments challenging [ $^{111}\text{In}$ ]In–PYTA with human serum .....                                                                                                                                                                     | 32 |

|                                                                                                                                                                              |    |
|------------------------------------------------------------------------------------------------------------------------------------------------------------------------------|----|
| Figure S33. Representative radio-TLC traces (TLC system B) from experiments challenging [ $^{111}\text{In}$ ]In–macropa with human serum .....                               | 33 |
| Figure S34. Representative radio-TLC traces (TLC system B) from experiments challenging [ $^{111}\text{In}$ ]In–macropa with human serum .....                               | 33 |
| Figure S35. Representative radio-TLC traces (TLC system B) from experiments challenging [ $^{111}\text{In}$ ]In–DOTA with human serum.....                                   | 34 |
| Figure S36. Representative radio-TLC traces (TLC system X) from experiments challenging [ $^{44}\text{Sc}$ ]Sc–PYTA with human serum .....                                   | 34 |
| Figure S37. Representative radio-TLC traces (TLC system X) from experiments challenging [ $^{44}\text{Sc}$ ]Sc–PYTA with human serum .....                                   | 35 |
| Figure S38. Volumes of interest (VOI) analysis of dynamic PET imaging of [ $^{44}\text{Sc}$ ]Sc–PYTA .....                                                                   | 36 |
| Figure S39. 2D quantitative slices of PET images of [ $^{44}\text{Sc}$ ]Sc–PYTA at t = 60 min, showing (plane 1) kidney and (plane 2) gut uptake and bladder clearance ..... | 36 |
| Figure A1. $^1\text{H}$ NMR spectrum of macropa.....                                                                                                                         | 40 |
| Figure A2. $^{13}\text{C}\{^1\text{H}\}$ NMR spectrum of macropa .....                                                                                                       | 41 |
| Figure A3. HPLC chromatogram of macropa .....                                                                                                                                | 41 |
| Figure A4. $^1\text{H}$ NMR spectrum of PYTA.....                                                                                                                            | 42 |
| Figure A5. $^{13}\text{C}\{^1\text{H}\}$ NMR spectrum of PYTA .....                                                                                                          | 43 |
| Figure A6. HPLC chromatogram of PYTA .....                                                                                                                                   | 43 |
| Figure B1. HPGe gamma-ray spectra of $^{225}\text{Ac}$ used in this work.....                                                                                                | 44 |
| Figure B2. HPGe gamma-ray spectra of $^{177}\text{Lu}$ used in this work .....                                                                                               | 45 |
| Figure B3. HPGe gamma-ray spectra of $^{111}\text{In}$ used in this work.....                                                                                                | 46 |
| Figure B4. HPGe gamma-ray spectra of $^{44}\text{Sc}$ used in this work.....                                                                                                 | 47 |

## 1. General Materials and Methods

*Caution! The isotopes  $^{225}\text{Ac}$ ,  $^{177}\text{Lu}$ ,  $^{111}\text{In}$ , and  $^{44}\text{Sc}$  are radioactive. Work should only be performed by trained personnel in facilities equipped to safely handle and store these materials.*

All solvents and reagents were of ACS grade or higher and were purchased from commercial sources. Deionized water ( $\geq 18\text{ M}\Omega\cdot\text{cm}$ ) was obtained from a Milli-Q Reference water purification system. 1,4,7,10-Tetraazacyclododecane- $N,N',N'',N'''$ -tetraacetic acid (DOTA, min. 98%) was purchased from Strem (Newburyport, MA, USA) and used as received. Macropa $\cdot 2\text{HCl}\cdot 1.5\text{H}_2\text{O}$  was prepared according to published literature procedures<sup>1-3</sup> and recrystallized four times from 6 M HCl (Optima HCl and ultra-trace elemental analysis grade  $\text{H}_2\text{O}$ , Fisher Scientific, Pittsburgh, PA, USA) by precipitation with acetone. PYTA was prepared as described previously<sup>4</sup> starting from  $\text{py}_2[18]\text{aneN}_6\cdot 0.2\text{HCl}\cdot 3.8\text{HBr}\cdot 0.5\text{H}_2\text{O}$ ,<sup>5</sup> with slight modifications. Specifically, 4.3 equiv of ethyl bromoacetate and 12 equiv of  $\text{Na}_2\text{CO}_3$  were used in the alkylation reaction. Following extraction, the crude material was heated for 2 days (unoptimized) in 6 M HCl at 90 °C to hydrolyze the ester groups. Purification of the product was achieved by semi-preparative reverse-phase  $\text{C}_{18}$  high-performance liquid chromatography (HPLC, Shimadzu, Kyoto, Japan) using a Restek Ultra Aqueous column (100 Å, 5  $\mu\text{m}$ , 250 mm  $\times$  21.2 mm, Bellefonte, PA) and a  $\text{MeOH}/\text{H}_2\text{O}$  mobile phase containing 0.1% trifluoroacetic acid.  $\text{PYTA}\cdot 3.8\text{CF}_3\text{COOH}$  was isolated as a white powder (1.347 g, 61% yield). The number of TFA counteranions per ligand varied slightly from batch to batch and is noted for each experiment. The purity and composition of macropa and PYTA were verified to be >99% by reverse-phase  $\text{C}_{18}$  analytical HPLC (Shimadzu HPLC; Restek Ultra Aqueous  $\text{C}_{18}$  column, 100 Å, 5  $\mu\text{m}$ , 250 mm  $\times$  4.6 mm), elemental analysis (Atlantic Microlab, Norcross, GA, USA), and  $^1\text{H}$  and  $^{13}\text{C}\{^1\text{H}\}$  nuclear magnetic resonance (NMR) spectroscopy (Avance III 400 MHz spectrometer equipped with a BBO probe, Bruker, Billerica, MA, USA). Spectra are provided in Appendix A of the Supporting Information. Chemical shifts are reported in parts per million (ppm). Spectra acquired in  $\text{CD}_3\text{OD}$  were referenced to a tetramethylsilane internal standard (0 ppm). Samples prepared in  $\text{D}_2\text{O}$  were spiked with  $\text{CH}_3\text{CN}$ , and the spectra were referenced to the corresponding signal at either 2.06 ppm ( $^1\text{H}$ ) or 1.47 ppm ( $^{13}\text{C}$ ). High-resolution mass spectra (HRMS) were obtained on a Q Exactive HF Orbitrap mass spectrometer (Thermo Scientific, Waltham, MA, USA) at 240,000 resolution in positive electrospray ionization (ESI) mode. Samples were introduced using an Open Port Sampling Interface (OPSI) on the instrument.

## 2. Computational Chemistry

Vienna *ab initio* simulation package (VASP)<sup>6,7</sup> was used to perform crystal structure calculations and *ab initio* molecular dynamics (AIMD) simulations using density functional theory (DFT). The valence electronic states were expanded on a basis of plane waves, while the core valence interactions were described using the Projector Augmented Wave (PAW) approach and standard PAW potentials were used.<sup>8,9</sup> The plane wave kinetic energy cutoff was set to 650 eV and the PBE GGA functional<sup>10</sup> was employed to describe the exchange-correlation interactions. The Brillouin zone was sampled using a well converged Gamma centered ( $2\times 1\times 1$ )  $k$ -point mesh for the crystal structure calculations, while the Gamma point approximation was used for the AIMD simulations. The DFT-D3 approach of Grimme<sup>11</sup> was used to account for the van der Waals interactions.

Cell and structural optimizations of  $[\text{La}(\text{H}_2\text{PYTA})](\text{NO}_3)\cdot 3\text{H}_2\text{O}$  and  $[\text{Ac}(\text{H}_2\text{PYTA})](\text{NO}_3)\cdot 3\text{H}_2\text{O}$  were carried out starting from the corresponding single-crystal XRD structure of the La complex.<sup>4</sup>

Since the position of hydrogen atoms were not resolved in the experimental crystal structure, they were placed in idealized positions using the Mercury program<sup>12</sup> developed by the Cambridge Crystallographic Data Centre (CCDC). The SCF convergence threshold was set to  $10^{-5}$  eV and a Pulay scheme<sup>13</sup> was used for charge density mixing during the SCF solution. A comparison between the DFT-optimized structural parameters and experimental data is provided in Table S1. The DFT-optimized bond lengths between  $\text{La}^{3+}$  and PYTA donor atoms showed good agreement with the experimental XRD data, validating the chosen level of theory. This level of theory was used to calculate a hypothetical crystal structure of the isostructural complex with  $\text{Ac}^{3+}$ . The DFT-predicted Ac–O and Ac–N bonds in the complex were found to be only slightly longer than the La–O and La–N bonds, consistent with the slightly larger ionic radius of  $\text{Ac}^{3+}$ . These results suggest that in the solid state,  $\text{Ac}^{3+}$ –PYTA structural characteristics can be approximated to some degree by the  $\text{La}^{3+}$ –PYTA surrogate crystal structure.

For the AIMD simulations, the initial structure of the  $[\text{La}(\text{PYTA})]^{+}/[\text{Ac}(\text{PYTA})]^{-}$  complex–water system (a periodic cubic box of 15 Å length containing one complex and 75 water molecules) was pre-equilibrated for 3 nanoseconds in a canonical ensemble at a temperature of 300 K using the extended PCFF force field<sup>14</sup> supported in Medea-LAMMPS (Medea®-2.20, Materials Design, Inc., Angel Fire, NM, USA, 2016).<sup>15,16</sup> AIMD simulations at 300 K were performed using the Nosé–Hoover thermostat<sup>16</sup> with a time step of 1 femtosecond. After equilibrating for 5 picoseconds (ps), the AIMD trajectory was collected for 20 ps and used for the radial distribution function analysis. The results are summarized in Figure S2. As expected based on the larger ionic radius of  $\text{Ac}^{3+}$  versus  $\text{La}^{3+}$ , the AIMD simulations predicted a slightly longer average Ac–O bond length of 2.65 Å in comparison to the average La–O distance (2.55 Å). Notably, all four carboxylate groups remain coordinated to the metal center over the course of 20 ps, supporting the notion that the  $\text{La}^{3+}$  complex approximates the  $\text{Ac}^{3+}$  complex in solution.

### **3. Solution-State Chemistry**

A stock solution of PYTA (4 mM) was prepared by massing  $\text{PYTA} \cdot 3.8 \text{ CF}_3\text{COOH}$  (19.8 mg, 0.02 mmol) into a 5 mL volumetric flask. The solid was dissolved in  $\text{D}_2\text{O}$  (1 mL) and lyophilized. This step was repeated once more. Then, the sample was diluted to 5 mL with  $\text{D}_2\text{O}$ . Using the same procedure, a stock solution of NaOD (1 M) was prepared in  $\text{D}_2\text{O}$  from semiconductor grade NaOH (Sigma Aldrich, 99.99%). Metal stock solutions (10 mM) were prepared in  $\text{D}_2\text{O}$  from their chloride salts ( $\text{LaCl}_3 \cdot 7\text{H}_2\text{O}$ , Alfa Aesar 99.99%;  $\text{LuCl}_3 \cdot 6\text{H}_2\text{O}$ , Thermo Scientific 99.9%; anhydrous  $\text{ScCl}_3$ , Aldrich 99.9%;  $\text{InCl}_3 \cdot x\text{H}_2\text{O}$ , Alfa Aesar 99.99%). The exact concentrations of these solutions were determined in quadruplicate by complexometric titration with a standardized solution of  $\text{Na}_2\text{EDTA}$ , using xylenol orange as an indicator.

NMR samples of La–, Lu–, In–, and Sc–PYTA (2 mM) were prepared by combining PYTA (300  $\mu\text{L}$ , 1.2  $\mu\text{mol}$ ), metal ion (113.8–151.8  $\mu\text{L}$ , 1.26  $\mu\text{mol}$ ), and  $\text{CH}_3\text{CN}$  (0.6  $\mu\text{mol}$  as an internal standard) in a vial. The total volume was brought to 0.600 mL with  $\text{D}_2\text{O}$ . Then, the pD of each solution was carefully adjusted to  $\sim 7$  using 1 M NaOD. The samples were allowed to stand for 1 h at ambient temperature ( $\sim 18^\circ\text{C}$ ), and then the  $^1\text{H}$  NMR spectra were collected. The  $\text{H}_2\text{O}$  signal was suppressed in these spectra using a presaturation pulse sequence. The  $\text{La}^{3+}$  sample was further heated at  $60^\circ\text{C}$  for 20 h, and the  $^1\text{H}$  NMR spectrum was re-acquired. Variable temperature  $^1\text{H}$  NMR spectra for the  $\text{In}^{3+}$  sample were obtained at 25, 40, 60, 70, 80,  $90^\circ\text{C}$ , with a 10 min equilibration time between each temperature change and spectral acquisition. The sample was then returned to  $25^\circ\text{C}$  and the  $^1\text{H}$  spectrum was re-acquired to ensure that it matched the spectrum of the sample prior to heating.

## **4. Solid-State Chemistry**

### **4.1 Synthesis of In–PYTA complex**

PYTA·2.5 CF<sub>3</sub>COOH (21.0 mg; 0.025 mmol), triethylamine (10.7 μL; 0.077 mmol), and EtOH (5 mL) were combined in a vial. The resulting solution was heated to 60 °C. Then, a solution of In(ClO<sub>4</sub>)<sub>3</sub>·8H<sub>2</sub>O (13.8 mg; 0.025 mmol) in EtOH (3 mL) was added dropwise. A white precipitate formed immediately. The suspension was stirred at 60 °C for 1 h and then concentrated to ~1 mL. An aliquot of H<sub>2</sub>O (3 mL) was added to the suspension, and it was heated at 70 °C until dissolution of the precipitate was complete (~1 h). Crystals suitable for single-crystal X-ray diffraction were obtained from slow evaporation of this solution after several days and were determined to have the composition [In(H<sub>2</sub>PYTA)]ClO<sub>4</sub>.

### **4.2 Synthesis of Sc–PYTA complex**

PYTA·3.8 CF<sub>3</sub>COOH (22.4 mg; 0.023 mmol), triethylamine (10.7 μL; 0.077 mmol), and EtOH (3 mL) were combined in a vial. To this solution was added Sc(ClO<sub>4</sub>)<sub>3</sub>·6H<sub>2</sub>O (50 wt% in H<sub>2</sub>O; 19.7 mg; 0.022 mmol) in EtOH (3 mL). White precipitate formed immediately. The precipitate was isolated via centrifugation, washed with EtOH (6 mL), and then dissolved in H<sub>2</sub>O (5 mL) with gentle heating (~40 °C). The aqueous solution was then concentrated at 60 °C to ~2 mL. Crystals suitable for single-crystal X-ray diffraction were obtained from slow evaporation of this solution after 1 week and were determined to have the composition [Sc(HPYTA)]·3H<sub>2</sub>O.

### **4.3 Synthesis of Cu–PYTA complex**

PYTA·3.8 CF<sub>3</sub>COOH (20.1 mg; 0.021 mmol), triethylamine (10.7 μL; 0.077 mmol) and EtOH (3 mL) were combined in a vial. The solution was heated at 70 °C for 15 min. To this solution was added Cu(ClO<sub>4</sub>)<sub>2</sub>·6H<sub>2</sub>O (11.8 mg; 0.032 mmol) in EtOH (3 mL). The reaction solution immediately turned green. The reaction volume was reduced to ~3 mL. Crystals suitable for single-crystal X-ray diffraction were obtained from slow evaporation after ~2 weeks and were determined to have the composition [Cu(H<sub>2</sub>PYTA)]·2H<sub>2</sub>O.

### **4.4 X-ray diffraction and refinement**

X-ray diffraction measurements were performed on a Bruker D8 Venture diffractometer equipped with an IμS 3.0 molybdenum X-ray source ( $\lambda = 0.71073$  Å). An Oxford Cryostream 800 was used to perform the data collection at room temperature. Apex IV software was used for data collection and unit cell determination. The crystal structures were solved using SHELXT and refined using SHELXL within the *OLEX2* GUI.<sup>17,18</sup> Non-hydrogen atoms were refined anisotropically. Hydrogen atoms bound to carbon were included in the model at geometrically calculated positions and refined using a riding model. Hydrogen atoms bound to heteroatoms were located in the Fourier electron density difference map and, unless otherwise noted, refined semi-freely with the use of temperature-appropriate distance restraints and coupled displacement parameters. The CIF files within this report were archived in the Cambridge Crystallographic Data Centre under CCDC deposition numbers 2297429, 2297430, and 2339314. Crystallographic data collection and refinement parameters are collected in Table S2 of Section S8 of the Supporting Information.

For the In–PYTA structure, the In complex resides on a crystallographic two-fold rotation axis, allowing the complex to assume its full *C*<sub>2</sub> molecular point-group symmetry in the solid state. The perchlorate anion was disordered about a two-fold axis with the chlorine atoms lying close to, but

not on, this special position. Because of the resulting proximity of the disordered oxygen atoms, distance restraints were employed. The Cl–O bond lengths and O···O distances were collectively refined using a single free variable given the geometric relationship for tetrahedra whereby the edge length is 1.633 times the length of the circumradius, i.e., Cl–O = 1.633(O···O). Rigid-bond and similarity restraints were also applied to the anisotropic displacement parameters of the atoms in the disordered anion. The disordered contents of channels that run through the crystal parallel to *c* and along the *R*-centered  $\bar{3}$  rotoinversion axes were masked.

For the Sc–PYTA structure, the pendent carboxylic acid was disordered across two positions. The hydrogen-bearing oxygen atoms were confirmed to be those with the longer C–O bond lengths. Refinement of these hydrogen atoms was performed using an idealized tetrahedral C–O–H angle and a constrained O–H distance of 0.82 Å, but free rotation was allowed about the C–O bond axis. The final position of this hydrogen atom afforded a coherent hydrogen-bonding network in the crystal. The final positions of the hydrogen atoms of the water molecules were also confirmed to form a coherent hydrogen-bonding pattern.

For the Cu–PYTA structure, a lower symmetry, monoclinic space group *C*<sub>2</sub>/*c*, like that observed for Sc–PYTA, was obtained. Two of the four carboxylic acids of PYTA are deprotonated, giving rise to an overall neutral Cu<sup>2+</sup> complex. The outer-sphere crystal structure environment of Cu–PYTA consists of four water molecules in which the hydrogen atoms were freely refined. These water molecules form a coherent hydrogen-bonding pattern with the hydrogens of the carboxylic acid groups.

## **5. Radionuclides**

### **5.1 Sourcing and solution preparation**

Actinium-225 (<sup>225</sup>Ac) was obtained from a <sup>229</sup>Th generator at Oak Ridge National Laboratory and received as a dried-down nitrate salt with a specific activity of 5.80 × 10<sup>4</sup> Ci/g (carrier free) and a radionuclidic purity of 99.99%. Upon receipt, it was reconstituted in 10 mM HCl (Fisher Optima HCl and Fisher ultra-trace elemental analysis grade H<sub>2</sub>O) to yield a stock solution of approximately 74 kBq <sup>225</sup>Ac/μL (2 μCi <sup>225</sup>Ac/μL). From this stock solution, working solutions of 0.93–1.11 kBq/μL (0.025–0.03 μCi/μL) or 3.7 kBq/μL (0.1 μCi/μL) were prepared prior to radiolabeling and serum stability experiments, respectively, by further dilution with 10 mM HCl.

Lutetium-177 (<sup>177</sup>Lu) was produced at the Missouri University Research Reactor (MURR) and purchased from the National Isotope Development Center (NIDC). It was received as a chloride solution (0.05 M HCl) with a specific activity ≥740 GBq/mg (≥20 Ci/mg) and a radionuclidic purity of ≥99%. From this stock solution, working solutions of 2.2–3.7 kBq/μL (0.06–0.1 μCi/μL) or 14.8 kBq/μL (0.4 μCi/μL) were prepared prior to radiolabeling and serum stability experiments, respectively, by further dilution with 10 mM HCl.

Indium-111 (<sup>111</sup>In) was purchased from BWXT Medical (Vancouver, BC) and received as a chloride solution (0.05 M HCl) with a specific activity >50 Ci/mg, an activity concentration of approximately 1,000 mCi/mL, and a radionuclidic purity of >99.9%. From this stock solution, working solutions of 7.4–11.1 kBq/μL (0.2–0.3 μCi/μL) or 18.5–29.6 kBq/μL (0.5–0.8 μCi/μL) were prepared prior to radiolabeling and serum stability experiments, respectively, by further dilution with 10 mM HCl.



Scandium-44 ( $^{44}\text{Sc}$ ) was eluted in 0.05 M HCl from a  $^{44}\text{Ti}/^{44}\text{Sc}$  generator as described in detail previously,<sup>19</sup> provided by the Department of Energy, yielding a stock solution of 1.8 ( $\pm 0.09$ ) mCi in 3.6 mL (0.5  $\mu\text{Ci}/\mu\text{L}$ , 18.5 kBq/ $\mu\text{L}$ ). The pH of the stock solution was adjusted to approximately 4.5 through addition of 5 M NaOH (25  $\mu\text{L}$ ) and  $\text{NH}_4\text{OAc}$  (0.25 M, pH 4.05). This solution was used for the labeling experiments below.

## 5.2 Gamma spectroscopy

The radionuclidic purity and activity of  $^{225}\text{Ac}$ ,  $^{177}\text{Lu}$ , and  $^{111}\text{In}$  solutions were verified by gamma spectroscopy using a Gamma Analyst Integrated Gamma Spectrometer (Canberra), which consists of a high-purity germanium (HPGe) detector (model GC-GA1), U-type cryostat, and automatic sample changer. The detector energy and efficiency were calibrated using a mixed gamma point source containing  $^{57}\text{Co}$ ,  $^{60}\text{Co}$ ,  $^{88}\text{Y}$ ,  $^{109}\text{Cd}$ ,  $^{113}\text{Sn}$ ,  $^{137}\text{Cs}$ ,  $^{139}\text{Ce}$ ,  $^{203}\text{Hg}$ , and  $^{241}\text{Am}$ , traceable to the National Institute of Standards and Technology (NIST) and supplied by Eckert & Ziegler Analytics (Atlanta, GA, USA). Samples to be counted were prepared by adding 10  $\mu\text{L}$  of working solution into 12  $\times$  75 mm polypropylene test tubes. Counting dead time was maintained below 5% for all measurements. Data was analyzed using Genie 2000 software (v3.2.1 Canberra). Spectral acquisitions of  $^{44}\text{Sc}$  were made for 1 h on a HPGe system (GEM-50195-S and Gamma-Vision v8.0, Ametek). Samples were placed 5 cm offset from the aluminum endcap, enclosed in a 10 cm lead shield (HPLBS1, Ametek). The spectra of these samples can be found in Appendix B of the Supporting Information (Figures B1–B4).

## 6. Radiolabeling and Serum Stability Studies

### 6.1 General

Stock solutions of PYTA, macropa, and DOTA were prepared in Milli-Q  $\text{H}_2\text{O}$ . The concentration of each solution was verified by potentiometric titration. Subsequently, the stocks were serially diluted with  $\text{H}_2\text{O}$  to afford a series of ligand solutions ranging from  $1.5 \times 10^{-7}$  to  $1.5 \times 10^{-2}$  M.  $\text{NH}_4\text{OAc}$  buffer (0.5 M, pH 6.0) was prepared using solid  $\text{NH}_4\text{OAc}$  (99.999% trace metals basis, Sigma-Aldrich) and glacial  $\text{HOAc}$  ( $\geq 99\%$ , Sigma-Aldrich), and was rendered metal-free by contact with Chelex (5 g/L) overnight via the batch method. It was subsequently filtered through a polypropylene column equipped with a 20  $\mu\text{m}$  polyethylene frit and stored in an acid-washed plastic bottle. Human serum from male AB plasma (USA origin, sterile-filtered) was purchased from Sigma-Aldrich. The following plate/mobile phase systems were used for radio thin-layer chromatography (radio-TLC):

**TLC System A:** Mobile phase: 50 mM ethylenediaminetetraacetic acid (EDTA) at pH 6.0, prepared by dissolving a suspension of  $\text{H}_4\text{EDTA}$  (99.995% trace metals basis, Sigma-Aldrich) in Milli-Q  $\text{H}_2\text{O}$  with NaOH. TLC plate: instant thin layer chromatography-silica gel (iTLC-SG) plates (Agilent).

**TLC System B:** Mobile phase: 0.4 M sodium citrate with 10% MeOH, prepared by mixing sodium citrate buffer (0.4 M, pH 6) with MeOH (9:1 v/v). TLC plate: aluminum-backed silica TLC plates (alumTLC-SG, silica gel 60, F254, Merck).

**TLC System C:** Mobile phase: 10 mM ammonium acetate:MeOH (9:1 v/v). TLC plate: aluminum-backed reverse-phase TLC plates (alumTLC-RP, silica gel 60, RP-18, F254, Merck).

**TLC System D:** Mobile phase: 50 mM EDTA at pH 5.5. TLC plate: instant thin layer chromatography-silica gel (iTLC-SG) plates (Gelman Sciences).

TLC System E: Mobile phase: saline. TLC plate: instant thin layer chromatography-silica gel (iTLC-SG) plates (Gelman Sciences).

TLC System F: Mobile phase: 0.4 M sodium citrate with 10% MeOH, prepared by mixing sodium citrate buffer (0.4 M, pH 6) with MeOH (9:1 v/v). TLC plate: aluminum-backed reverse-phase TLC plates (alumTLC-RP, silica gel 60, RP-18, F254, Merck).

## 6.2 Concentration-dependent radiolabeling

Radiolabeling experiments with  $^{225}\text{Ac}$ ,  $^{177}\text{Lu}$ ,  $^{111}\text{In}$ , and  $^{44}\text{Sc}$  were performed in triplicate at each chelator concentration by addition of chelator (10  $\mu\text{L}$ ) and radionuclide working solution (10  $\mu\text{L}$ ; 9.3–11.1 kBq  $^{225}\text{Ac}$ , 22–37 kBq  $^{177}\text{Lu}$ , 74–111 kBq  $^{111}\text{In}$ , or 185 kBq  $^{44}\text{Sc}$ ) to polypropylene screw-capped tubes containing pH 6  $\text{NH}_4\text{OAc}$  buffer (130  $\mu\text{L}$ ), giving a final chelator concentration of  $10^{-8}$ – $10^{-3}$  M. Control samples were also prepared in which chelator was substituted with  $\text{H}_2\text{O}$ . The samples were shaken to ensure complete mixing and then incubated at room temperature for 5 min. After removing an aliquot for radio-TLC, the samples were rotated end-over-end in an incubator at 25 °C until the next time point (60 min). Radiolabeling of DOTA at 80 °C was also performed for comparison. The pH of representative samples was confirmed to be 6 by spotting an aliquot (1  $\mu\text{L}$ ) onto a pH indicator strip. Additionally, radiolabeling experiments with 1.665 MBq of  $^{44}\text{Sc}$  were executed for PYTA in triplicate in an analogous manner, except the final reaction volume was 100  $\mu\text{L}$ , the final pH was approximately 4.5, and the mixing time was 30 min.

The radiolabeling progress was analyzed via radio-TLC by spotting an aliquot (5  $\mu\text{L}$ ) of reaction solution onto iTLC-SG, alumTLC-SG, or alumTLC-RP plates and developing them using the mobile phases described above. Retention factors ( $R_f$ ) are provided in Table S3. Representative examples of developed TLC plates are shown in Figures S10–S23. For  $^{225}\text{Ac}$  radio-TLC, strips were analyzed approximately 24 h after their development to allow sufficient time for radioactive equilibrium to be reached between  $^{225}\text{Ac}$  and its decay chain.  $^{177}\text{Lu}$ ,  $^{111}\text{In}$ , and  $^{44}\text{Sc}$  radio-TLC strips were analyzed immediately. TLC imaging was performed using an AR-2000 scanner system equipped with P-10 gas and either *WinScan 3* or *WinScan 2D* imaging software (Eckert & Ziegler Radiopharma Inc). Radiochemical yields (RCYs) were calculated by dividing the counts associated with complexed radionuclide by the total counts integrated along the length of the TLC plate.

## 6.3 Serum challenges

Chelators were radiolabeled at the concentrations indicated in Table S4 for 60 min at 25 °C (PYTA, macropa) or 80 °C (DOTA) with  $^{225}\text{Ac}$  (37 kBq),  $^{177}\text{Lu}$  (148 kBq),  $^{111}\text{In}$  (185–296 kBq), or  $^{44}\text{Sc}$  (740 kBq, PYTA only) in pH 6.0  $\text{HOAc-NH}_4\text{OAc}$  buffer (150  $\mu\text{L}$  final volume). Each concentration of chelator was selected based on the lowest concentration that gave quantitative or nearly quantitative RCYs in radiolabeling experiments (Section 6.2), multiplied by a factor of 4 to account for subsequent dilution by serum. RCYs of >97% were confirmed by radio-TLC for all radiolabeling reactions except for the [ $^{177}\text{Lu}$ ]Lu–macropa reaction, which had a RCY of 82%. Next, an aliquot of human serum (450  $\mu\text{L}$ ) was added to each sample, yielding a final reaction volume of 600  $\mu\text{L}$  and final chelator concentrations ranging from  $1 \times 10^{-5}$  M to  $1 \times 10^{-3}$  M (Table S4). Control samples were also prepared in which chelator was substituted with  $\text{H}_2\text{O}$  and diluted with 450  $\mu\text{L}$  of serum. The samples were rotated end-over-end at 37 °C and sampled at predetermined time points. The percentage of intact complex was determined by radio-TLC, as described in Section 6.2 above. The final pH of representative samples was determined to be 7 by spotting an aliquot (1  $\mu\text{L}$ ) of reaction solution onto a pH indicator strip.

## **7. PET Imaging and Ex Vivo Biodistribution**

### **7.1 General**

All radioactive material handling and animal experimentation were conducted in compliance with institutional regulations and approved by Environmental Health and Safety Radioactive Materials protocol #1169-01 and Institutional Animal Care and Use Committee protocol #22-0023. Female Swiss Webster mice (6–8 weeks, from Charles River Laboratories) were purchased for imaging and biodistribution studies. A total of 16 mice were used for the biodistribution study of the  $^{225}\text{Ac}$ –PYTA complex and 12 mice for the  $^{44}\text{Sc}$ –PYTA complex, with  $n = 4$  per time point. Additionally, 4 mice were used for the  $^{44}\text{Sc}$ –PYTA PET imaging study.

### **7.2 $^{225}\text{Ac}$ studies**

PYTA ( $1 \times 10^{-3}$  M) was radiolabeled with  $^{225}\text{Ac}$  (185 kBq, 5  $\mu\text{Ci}$ ) at room temperature in  $\text{NH}_4\text{OAc}$  buffer (0.25 M, pH 6) containing gentisic acid (1 mM) and ascorbic acid (1 mM). The final volume of the reaction solution was 500  $\mu\text{L}$ . After 60 min, the reaction was spotted onto an alumTLC-SG strip and developed using TLC system B, which confirmed >98% RCY. The reaction was allowed to proceed for 48 h and then re-sampled, and the RCY was again confirmed to be >98%. At this time, the reaction solution was diluted 10-fold with saline for intravenous administration. Mice were anesthetized by isoflurane in air (2%, 2 L/min), and approximately 100  $\mu\text{L}$  (~3.7 kBq, 100 nCi) of  $^{225}\text{Ac}$  complex was administered intravenously to mice by retro-orbital injection. Each group was sacrificed after 15 min, 1 h, 24 h, or 48 h post-injection. Selected tissues and biological fluids were collected, weighed, and gamma counted at equilibrium (>4 h). Counts were decay corrected from the time of injection and then converted to the percentage of injected activity (% IA) per gram of weighed tissue (% IA/g).

### **7.3 $^{44}\text{Sc}$ studies**

PYTA (5.7 mM, 15  $\mu\text{L}$ ) was radiolabeled with  $^{44}\text{Sc}$  (33.5 MBq, 906  $\mu\text{Ci}$ ) at room temperature in  $\text{NH}_4\text{OAc}$  buffer (0.25 M, pH 6). The final volume of the reaction solution was 1.5 mL. After 40 min, the reaction was spotted onto an alumTLC-RP strip and developed using TLC system C, which confirmed >98% RCY. After the reaction, a Sep-Pak C18 cartridge (Waters) was used to purify the final compound. The labeled compound was eluted using EtOH and diluted with saline for intravenous administration. Radiolabeled solutions were prepared fresh for PET imaging and biodistribution studies, which were carried out on different days. Mice were anesthetized by isoflurane in air (2%, 2 L/min), and approximately 100  $\mu\text{L}$  (~5.18 MBq, 140  $\mu\text{Ci}$ ) of  $^{44}\text{Sc}$  complex was administered to mice by intravenous tail vein catheter for dynamic imaging. Animals were imaged using the microPET R4 (Siemens) and data was corrected for detector non-uniformity, dead time, random coincidences and physical decay. An energy window of 350–650 keV and coincidence-timing window of 6 ns was used. Activity concentration calibrated data was reconstructed and visualized using ASIProVM (Siemens). Animals for biodistribution were administered activity intravenously by the retroorbital sinus (~2.775 MBq, 75  $\mu\text{Ci}$  in 100  $\mu\text{L}$ ) and were sacrificed after 15 min, 1 h, or 4 h post-injection ( $n = 4$  per time point). Selected tissues and biological fluids were collected, weighed, and gamma counted. Counts were decay corrected from the time of injection and then converted to the percentage of injected activity (% IA) per gram of weighed tissue (% IA/g) determined by automated microbalance.

## 8. Supporting Figures, Tables, and Schemes

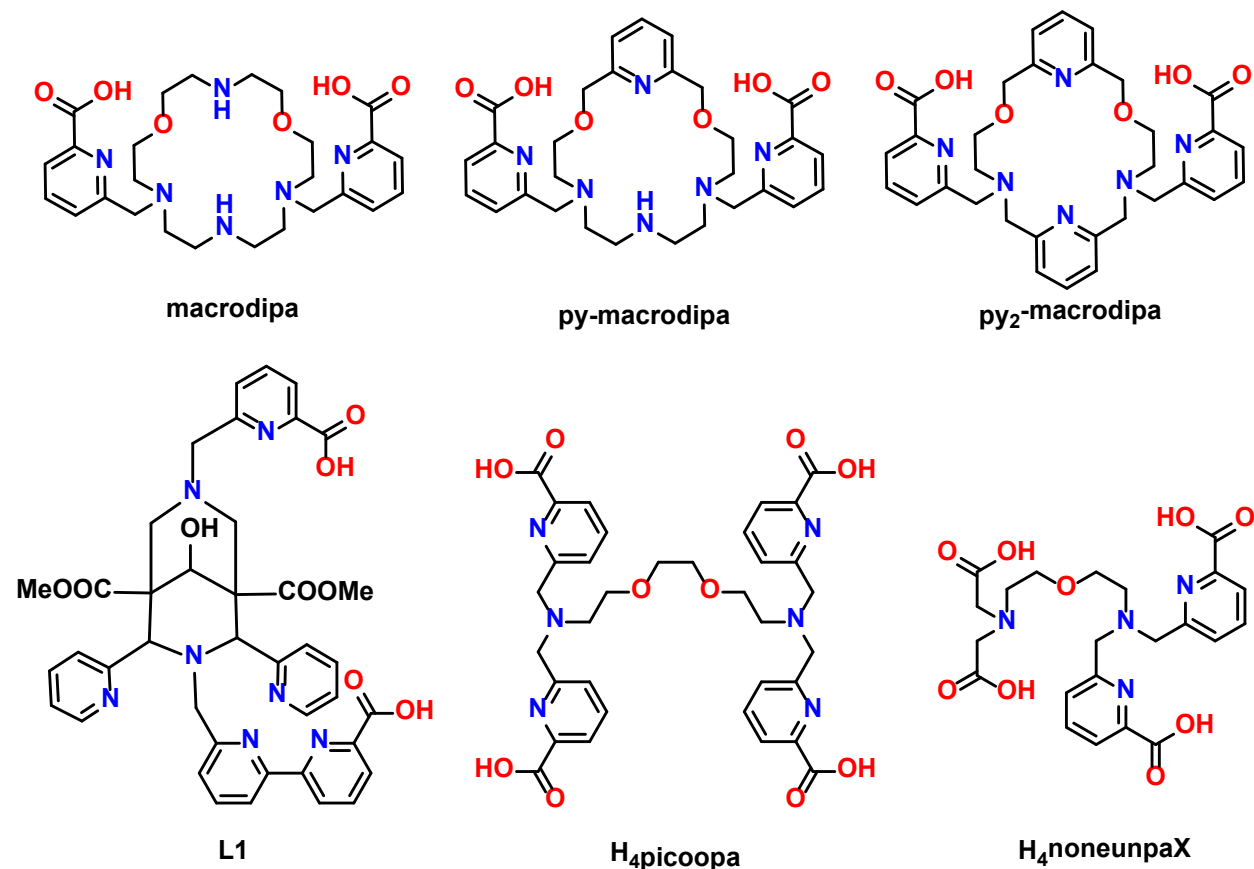

**Figure S1.** Chelators mentioned in the main text.

**Table S1.** Summary of selected structural parameters for  $[\text{La}(\text{H}_2\text{PYTA})](\text{NO}_3) \cdot 3\text{H}_2\text{O}$  and  $[\text{Ac}(\text{H}_2\text{PYTA})](\text{NO}_3) \cdot 3\text{H}_2\text{O}$  obtained from DFT periodic structure calculations.

|                                    | $[\text{La}(\text{H}_2\text{PYTA})](\text{NO}_3) \cdot 3\text{H}_2\text{O}^a$ | $[\text{La}(\text{H}_2\text{PYTA})](\text{NO}_3) \cdot 3\text{H}_2\text{O}$ | $[\text{Ac}(\text{H}_2\text{PYTA})](\text{NO}_3) \cdot 3\text{H}_2\text{O}$ |
|------------------------------------|-------------------------------------------------------------------------------|-----------------------------------------------------------------------------|-----------------------------------------------------------------------------|
| M–N <sub>py</sub>                  | 2.637(1)                                                                      | 2.639                                                                       | 2.677                                                                       |
| M–N <sub>amine</sub>               | 2.702(10)                                                                     | 2.746                                                                       | 2.794                                                                       |
| M–O <sub>carb</sub>                | 2.604(69)                                                                     | 2.602                                                                       | 2.674                                                                       |
| N <sub>py</sub> –M–N <sub>py</sub> | 178.40(7)                                                                     | 174.94                                                                      | 173.57                                                                      |

<sup>a</sup>Experimental structural data were taken from single-crystal X-ray diffraction.<sup>4</sup> Values in parentheses are one standard deviation (of the last significant figures) from the average of crystallographically independent values.

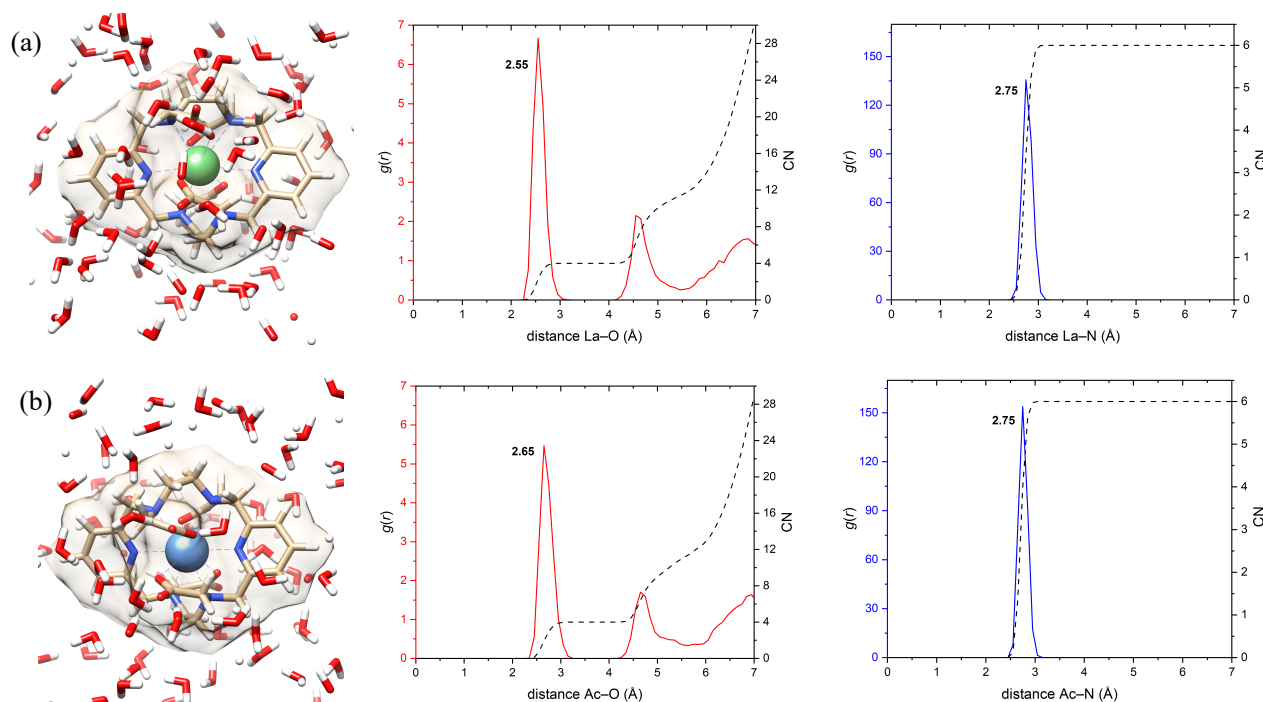

**Figure S2. Structural parameters of the  $[\text{La}(\text{PYTA})]^-$  and  $[\text{Ac}(\text{PYTA})]^-$  complexes in aqueous solution obtained from ab initio molecular dynamics (AIMD) simulations.** Radial distribution functions ( $g(r)$ ; solid curve, left axis) and their integration (coordination number, CN; dashed curve, right axis) of oxygen atoms, including PYTA donor atoms and water molecules, and PYTA nitrogen atoms around (a)  $\text{La}^{3+}$  and (b)  $\text{Ac}^{3+}$ . The first peak in the  $\text{La-O}/\text{Ac-O}$   $g(r)$  originates from the interactions between  $\text{La}^{3+}/\text{Ac}^{3+}$  and carboxylate oxygens, whereas the second and third peaks correspond to atomic pair correlations with non-coordinating carboxylate oxygens and water molecules, respectively. As expected based on the larger ionic radius of  $\text{Ac}^{3+}$  versus  $\text{La}^{3+}$ , the AIMD simulations predicted a slightly longer average  $\text{Ac-O}$  bond length of 2.65 Å in comparison to the average  $\text{La-O}$  distance (2.55 Å). Notably, all four carboxylate groups remain coordinated to the metal center over the course of 20 ps, supporting the notion that the  $\text{La}^{3+}$  complex approximates the  $\text{Ac}^{3+}$  complex in solution.

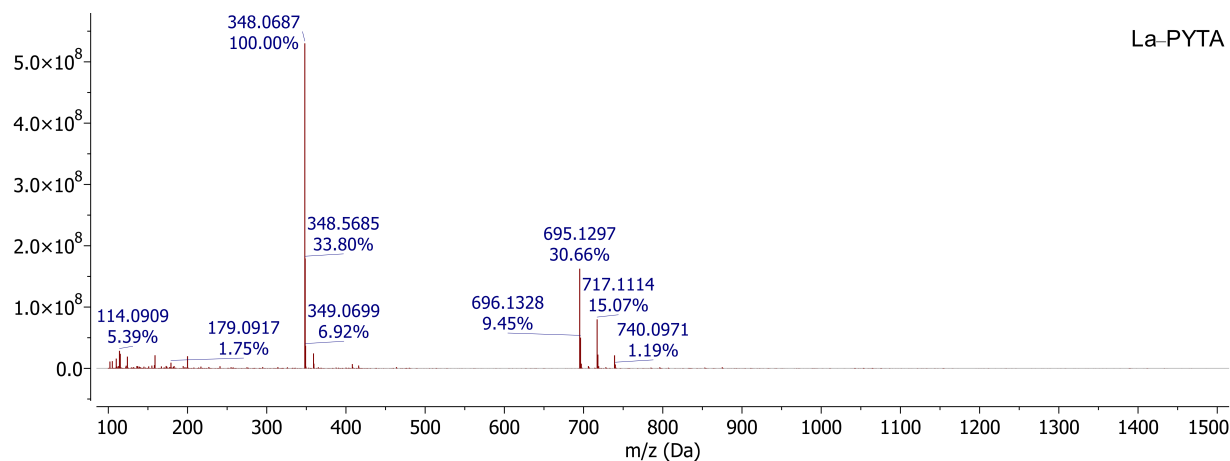

**Figure S3. ESI-HRMS of La-PYTA.** The sample was prepared by diluting the  $^1\text{H}$  NMR sample with  $\text{CH}_3\text{CN}/\text{water}/\text{formic acid}$  (75/25/0.1).  $[\text{M}+3\text{H}]^{2+}$  ( $m/z$  348.0687, calcd for  $[\text{C}_{26}\text{H}_{30}\text{N}_6\text{O}_8\text{La}+3\text{H}]^{2+}$ : 348.0706),  $[\text{M}+2\text{H}]^+$  ( $m/z$  695.1297, calcd for  $[\text{C}_{26}\text{H}_{30}\text{N}_6\text{O}_8\text{La}+2\text{H}]^+$ : 695.1340),  $[\text{M}+\text{H}+\text{Na}]^+$  ( $m/z$  717.1114, calcd for  $[\text{C}_{26}\text{H}_{30}\text{N}_6\text{O}_8\text{La}+\text{H}+\text{Na}]^+$ : 717.1160).

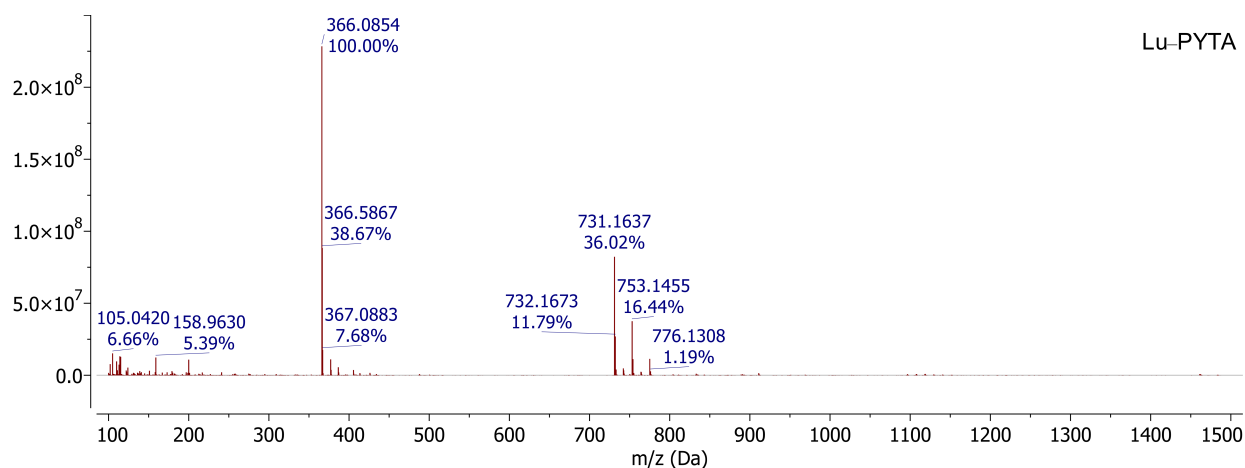

**Figure S4. ESI-HRMS of Lu-PYTA.** The sample was prepared by diluting the  $^1\text{H}$  NMR sample with  $\text{CH}_3\text{CN}/\text{water}/\text{formic acid}$  (75/25/0.1).  $[\text{M}+3\text{H}]^{2+}$  ( $m/z$  366.0854, calcd for  $[\text{C}_{26}\text{H}_{30}\text{N}_6\text{O}_8\text{Lu}+3\text{H}]^{2+}$ : 366.0879),  $[\text{M}+2\text{H}]^+$  ( $m/z$  731.1637, calcd for  $[\text{C}_{26}\text{H}_{30}\text{N}_6\text{O}_8\text{Lu}+2\text{H}]^+$ : 731.1684),  $[\text{M}+\text{H}+\text{Na}]^+$  ( $m/z$  753.1455, calcd for  $[\text{C}_{26}\text{H}_{30}\text{N}_6\text{O}_8\text{Lu}+\text{H}+\text{Na}]^+$ : 753.1504).

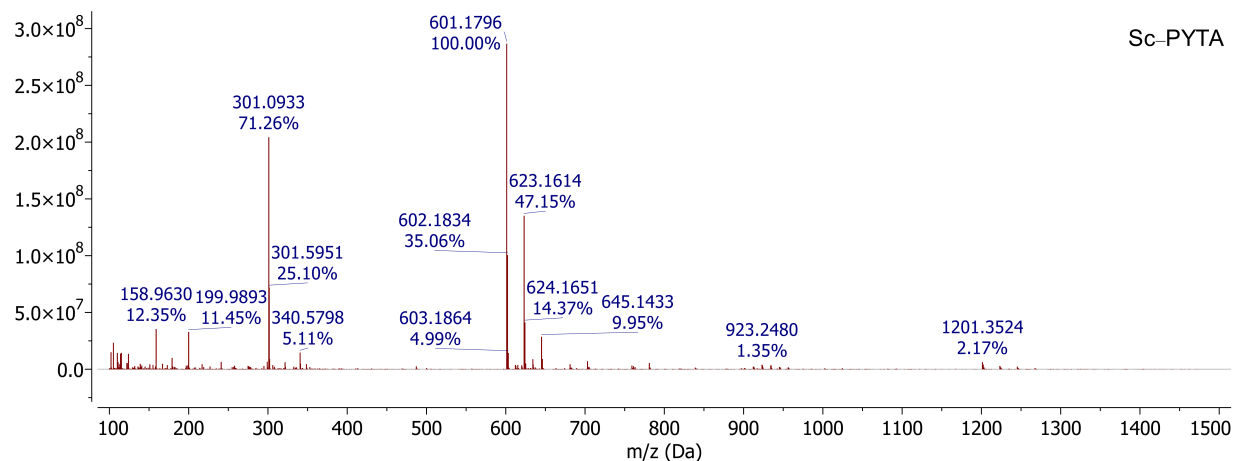

**Figure S5. ESI-HRMS of Sc-PYTA.** The sample was prepared by diluting the  $^1\text{H}$  NMR sample with  $\text{CH}_3\text{CN}/\text{water}/\text{formic acid}$  (75/25/0.1).  $[\text{M}+3\text{H}]^{2+}$  ( $m/z$  301.0933, calcd for  $[\text{C}_{26}\text{H}_{30}\text{N}_6\text{O}_8\text{Sc}+3\text{H}]^{2+}$ : 301.0954),  $[\text{M}+2\text{H}]^+$  ( $m/z$  601.1796, calcd for  $[\text{C}_{26}\text{H}_{30}\text{N}_6\text{O}_8\text{Sc}+2\text{H}]^+$ : 601.1836),  $[\text{M}+\text{H}+\text{Na}]^+$  ( $m/z$  623.1614, calcd for  $[\text{C}_{26}\text{H}_{30}\text{N}_6\text{O}_8\text{Sc}+\text{H}+\text{Na}]^+$ : 623.1655),  $[\text{M}+2\text{Na}]^+$  ( $m/z$  645.1433, calcd for  $[\text{C}_{26}\text{H}_{30}\text{N}_6\text{O}_8\text{Sc}+2\text{Na}]^+$ : 645.1475).

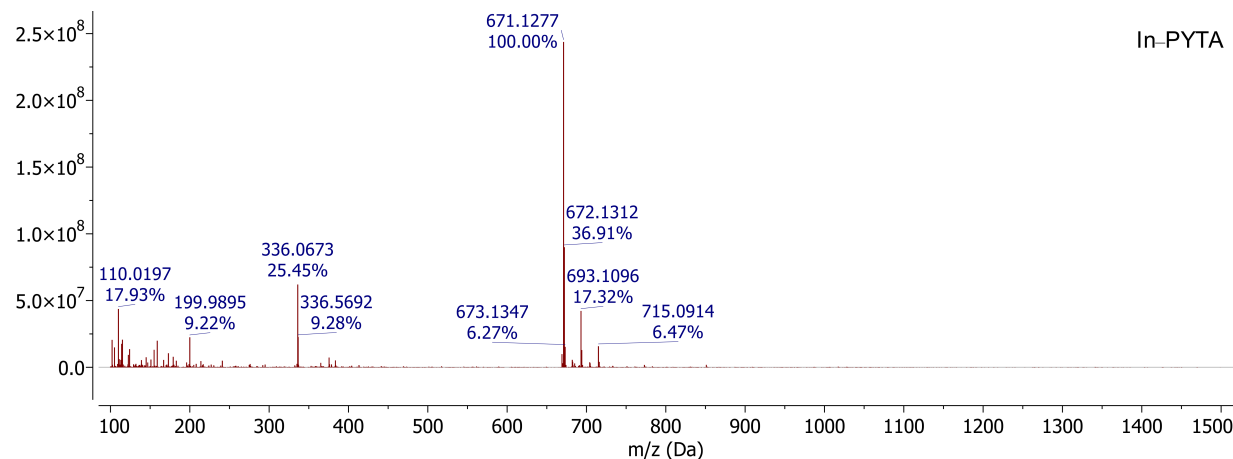

**Figure S6. ESI-HRMS of In-PYTA.** The sample was prepared by diluting the  $^1\text{H}$  NMR sample with  $\text{CH}_3\text{CN}/\text{water}/\text{formic acid}$  (75/25/0.1).  $[\text{M}+3\text{H}]^{2+}$  ( $m/z$  336.0673, calcd for  $[\text{C}_{26}\text{H}_{30}\text{N}_6\text{O}_8\text{In}+3\text{H}]^{2+}$ : 336.0694),  $[\text{M}+2\text{H}]^+$  ( $m/z$  671.1277, calcd for  $[\text{C}_{26}\text{H}_{30}\text{N}_6\text{O}_8\text{In}+2\text{H}]^+$ : 671.1315),  $[\text{M}+\text{H}+\text{Na}]^+$  ( $m/z$  693.1096, calcd for  $[\text{C}_{26}\text{H}_{30}\text{N}_6\text{O}_8\text{In}+\text{H}+\text{Na}]^+$ : 693.1135),  $[\text{M}+2\text{Na}]^+$  ( $m/z$  715.0914, calcd for  $[\text{C}_{26}\text{H}_{30}\text{N}_6\text{O}_8\text{In}+2\text{Na}]^+$ : 715.0954).

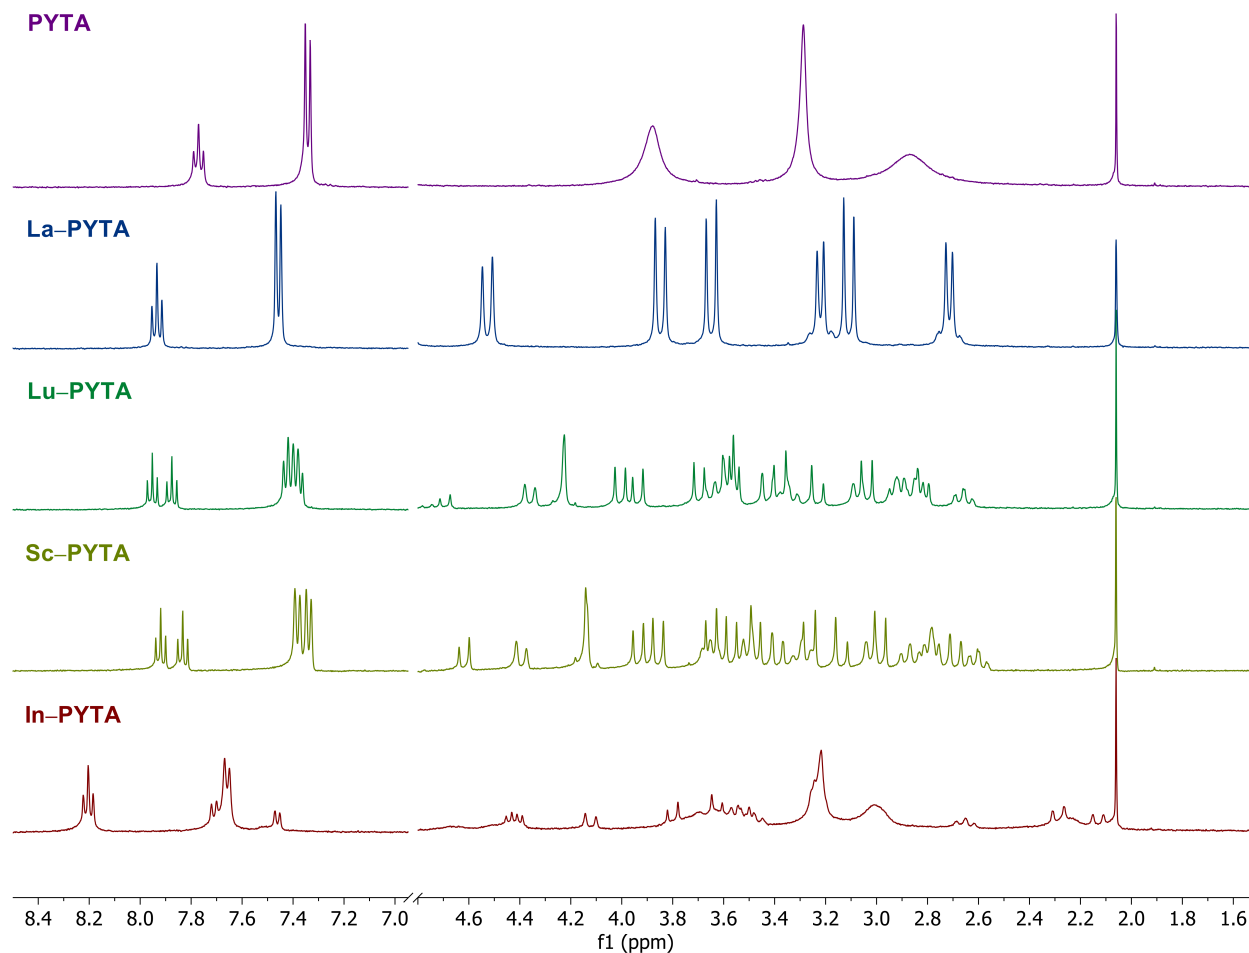

**Figure S7.  $^1\text{H}$  NMR spectra of metal-PYTA complexes.** Top to bottom: PYTA, La-PYTA, Lu-PYTA, Sc-PYTA, and In-PYTA. 2 mM in  $\text{D}_2\text{O}$  at pD 7.0, internally referenced to acetonitrile, with suppression of  $\text{H}_2\text{O}$  via presaturation. The region between 4.6 ppm and 7.0 ppm, which contained only the residual  $\text{H}_2\text{O}$  peak, has been omitted for clarity.



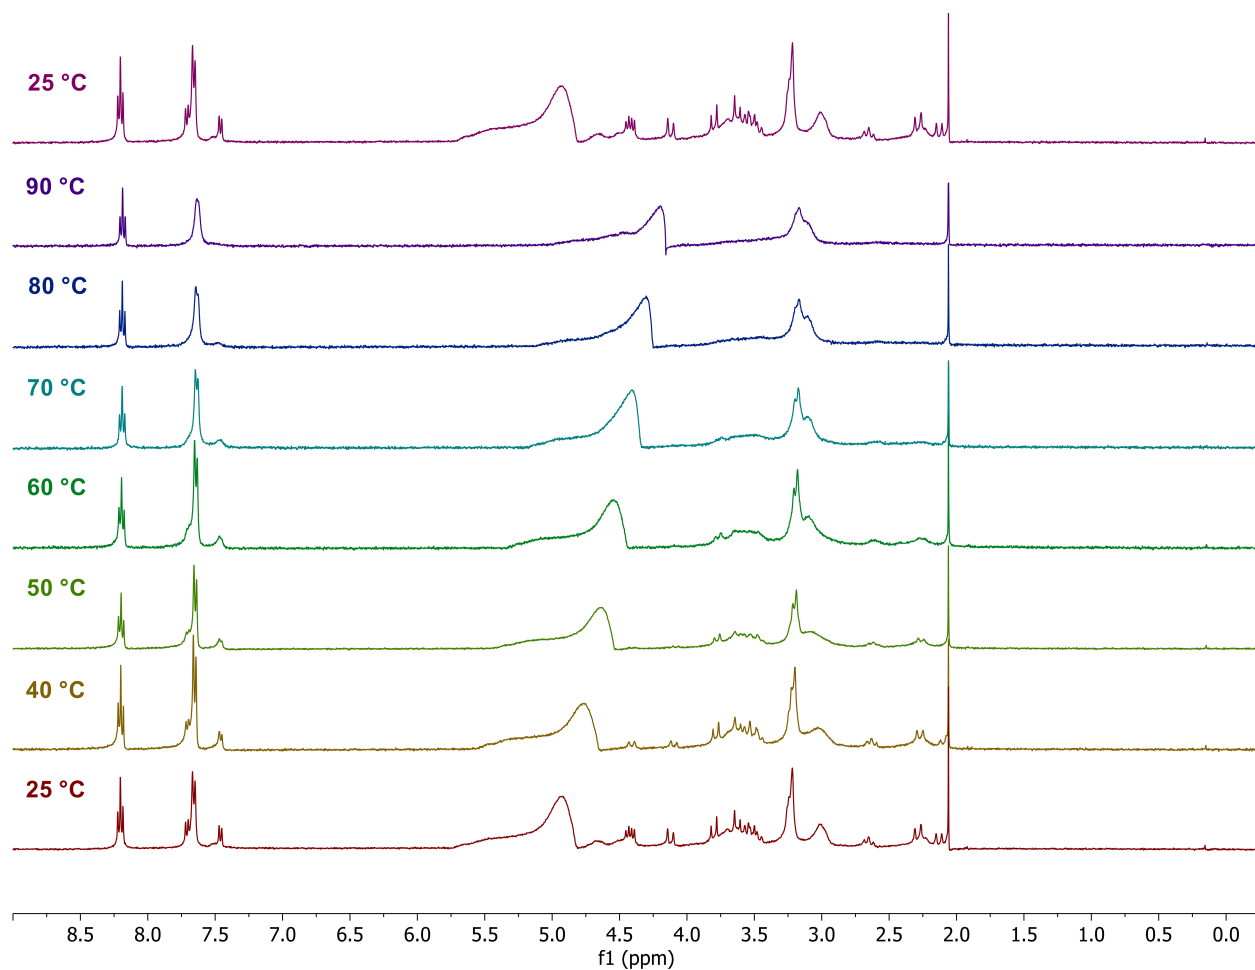

**Figure S8. Variable temperature  $^1\text{H}$  NMR spectra of In-PYTA.** Bottom to top: 25, 40, 50, 60, 70, 80, 90, 25 °C. 2 mM in  $\text{D}_2\text{O}$  at pD 7, internally referenced to acetonitrile, with suppression of  $\text{H}_2\text{O}$  via presaturation.

**Table S2.** X-ray crystallographic data collection and refinement parameters for [In(H<sub>2</sub>PYTA)]ClO<sub>4</sub>, [Sc(HPYTA)]·3H<sub>2</sub>O, and [Cu(H<sub>2</sub>PYTA)]·4H<sub>2</sub>O.

| Compound                                                                   | [In(H <sub>2</sub> PYTA)]ClO <sub>4</sub>                          | [Sc(HPYTA)]·3H <sub>2</sub> O                                    | [Cu(H <sub>2</sub> PYTA)]·4H <sub>2</sub> O                      |
|----------------------------------------------------------------------------|--------------------------------------------------------------------|------------------------------------------------------------------|------------------------------------------------------------------|
| Empirical formula                                                          | C <sub>26</sub> H <sub>32</sub> ClInN <sub>6</sub> O <sub>12</sub> | C <sub>26</sub> H <sub>37</sub> ScN <sub>6</sub> O <sub>11</sub> | C <sub>26</sub> H <sub>40</sub> CuN <sub>6</sub> O <sub>12</sub> |
| Formula weight                                                             | 770.84                                                             | 654.57                                                           | 692.18                                                           |
| <i>a</i> (Å)                                                               | 30.4838(4)                                                         | 37.2521(6)                                                       | 13.012(5)                                                        |
| <i>b</i> (Å)                                                               | 30.4838(4)                                                         | 11.0181(2)                                                       | 14.323(5)                                                        |
| <i>c</i> (Å)                                                               | 17.4815(3)                                                         | 14.5531(2)                                                       | 15.919(6)                                                        |
| $\alpha$ (°)                                                               | 90                                                                 | 90                                                               | 90                                                               |
| $\beta$ (°)                                                                | 90                                                                 | 90.1060(10)                                                      | 99.63(2)                                                         |
| $\gamma$ (°)                                                               | 120                                                                | 90                                                               | 90                                                               |
| <i>V</i> (Å <sup>3</sup> )                                                 | 14068.5(4)                                                         | 5973.27(17)                                                      | 2925.0(19)                                                       |
| <i>Z</i>                                                                   | 18                                                                 | 8                                                                | 4                                                                |
| Crystal system                                                             | Trigonal                                                           | Monoclinic                                                       | Monoclinic                                                       |
| Space group                                                                | <i>R</i> $\bar{3}c$                                                | <i>C</i> 2/ <i>c</i>                                             | <i>C</i> 2/ <i>c</i>                                             |
| $\rho_{\text{calc}}$ (g/cm <sup>3</sup> )                                  | 1.638                                                              | 1.456                                                            | 1.572                                                            |
| $\mu$ (mm <sup>-1</sup> )                                                  | 0.913                                                              | 0.316                                                            | 0.822                                                            |
| <i>T</i> (K)                                                               | 301.20                                                             | 300.40                                                           | 300.80                                                           |
| 2 $\theta$ range (°)                                                       | 5.590 to 65.34                                                     | 4.760 to 64.10                                                   | 4.70 to 69.94                                                    |
| Independent reflections                                                    | 9934                                                               | 9901                                                             | 6606                                                             |
| <i>R</i> <sub>int</sub>                                                    | 0.0251                                                             | 0.0444                                                           | 0.0366                                                           |
| Number of parameters                                                       | 235                                                                | 445                                                              | 226                                                              |
| Max, min peaks (e <sup>-</sup> Å <sup>-3</sup> )                           | 0.443, 0.271                                                       | 0.934, 0.262                                                     | 0.437, 0.349                                                     |
| <i>R</i> <sup>1</sup> / <i>wR</i> <sup>2</sup> <sub>b</sub> (all data)     | 0.0315/0.0655                                                      | 0.0529/0.1234                                                    | 0.0461/0.0985                                                    |
| <i>R</i> <sup>1</sup> / <i>wR</i> <sup>2</sup> <sub>b</sub> (>2 $\sigma$ ) | 0.0251/0.0617                                                      | 0.0444/0.1172                                                    | 0.0366/0.0928                                                    |
| Goodness of fit <sup>c</sup>                                               | 1.039                                                              | 1.039                                                            | 1.031                                                            |

<sup>a</sup>  $R_1 = \sum ||F_o| - |F_c|| / \sum |F_o|$  for  $I > 2\sigma$ . <sup>b</sup>  $wR_2 = \{\sum [w(F_o^2 - F_c^2)^2] / \sum [w(F_o^2)^2]\}^{1/2}$  for  $I > 2\sigma$ . <sup>c</sup>  $\text{GoF} = \{\sum [w(F_o^2 - F_c^2)^2] / (n - p)\}^{1/2}$ , where *n* is the number of data and *p* is the number of refined parameters.

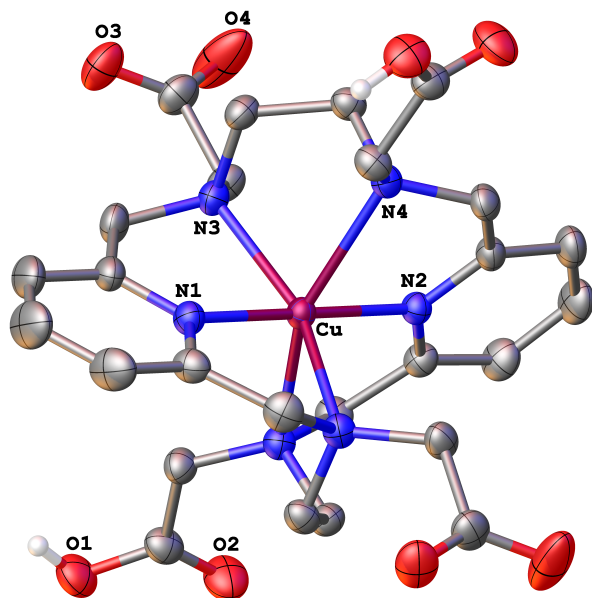

**Figure S9.** X-ray crystal structure of the Cu<sup>2+</sup> complex of PYTA. Ellipsoids for carbons and heteroatoms are drawn at the 50% probability level. Outer-sphere solvent molecules and hydrogen atoms attached to carbon centers have been omitted for clarity.

**Table S3.** TLC systems and retention factors ( $R_f$ ) for radiolabeling experiments of PYTA, macropa, and DOTA with  $^{225}\text{Ac}^{3+}$ ,  $^{177}\text{Lu}^{3+}$ ,  $^{111}\text{In}^{3+}$ , and  $^{44}\text{Sc}^{3+}$ .

|                | $^{225}\text{Ac}^{3+}$ |              |           | $^{177}\text{Lu}^{3+}$ |              |           | $^{111}\text{In}^{3+}$ |              |           | $^{44}\text{Sc}^{3+}$ |              |           |
|----------------|------------------------|--------------|-----------|------------------------|--------------|-----------|------------------------|--------------|-----------|-----------------------|--------------|-----------|
|                | TLC                    | $R_f M^{3+}$ | $R_f M-L$ | TLC                    | $R_f M^{3+}$ | $R_f M-L$ | TLC                    | $R_f M^{3+}$ | $R_f M-L$ | TLC                   | $R_f M^{3+}$ | $R_f M-L$ |
| <b>PYTA</b>    | A or B                 | 1            | 0.04      | B                      | 1            | 0.04      | B                      | 0.8-1        | 0.06      | C                     | 0.2          | 0.4       |
| <b>macropa</b> | A                      | 1            | 0.08      | A                      | 1            | 0.06      | B                      | 0.8-1        | 0.01      | D                     | 0.9          | 0.2       |
| <b>DOTA</b>    | B                      | 1            | 0.12      | B                      | 1            | 0.12      | B                      | 0.8-1        | 0.09      | E                     | 0.2          | 0.8       |

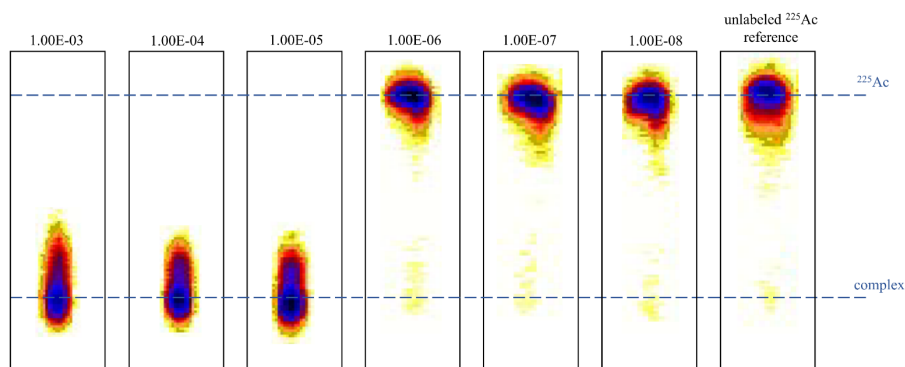

**Figure S10.** Representative radio-TLC traces from  $^{225}\text{Ac}^{3+}$  radiolabeling of **PYTA** using TLC system A. Reaction conditions:  $\text{NH}_4\text{OAc}$  buffer (0.5 M, pH 6), RT, 5 min, 9.3–11.1 kBq of  $^{225}\text{Ac}$ ,  $10^{-8}$ – $10^{-3}$  M PYTA,  $V_{\text{tot}} = 150 \mu\text{L}$ .

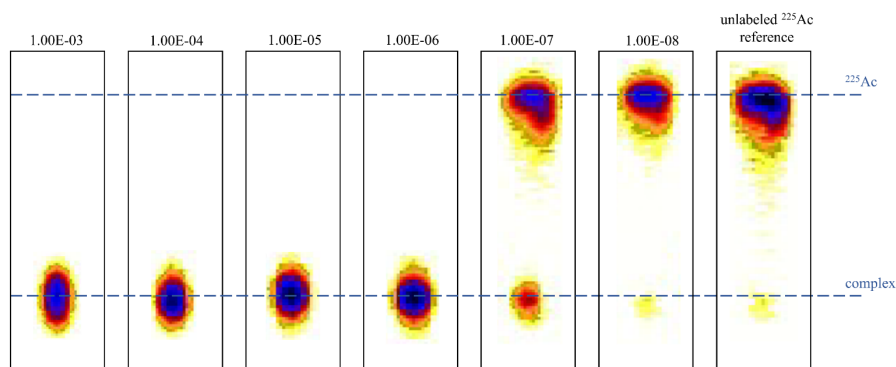

**Figure S11.** Representative radio-TLC traces from  $^{225}\text{Ac}^{3+}$  radiolabeling of **macropa** using TLC system A. Reaction conditions:  $\text{NH}_4\text{OAc}$  buffer (0.5 M, pH 6), RT, 5 min, 9.3–11.1 kBq of  $^{225}\text{Ac}$ ,  $10^{-8}$ – $10^{-3}$  M macropa,  $V_{\text{tot}} = 150 \mu\text{L}$ . Figure reproduced from ref 20.

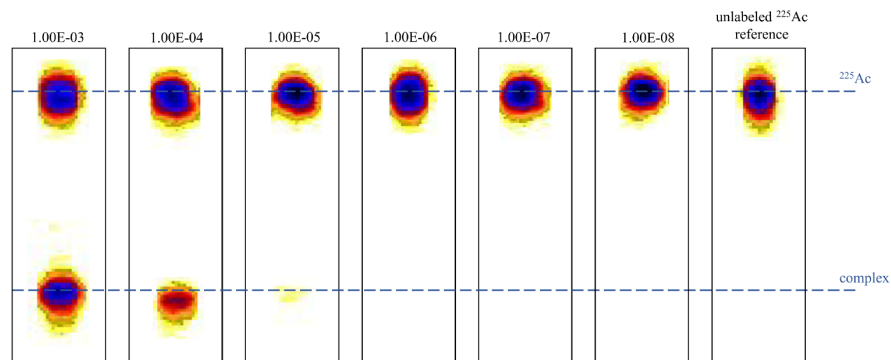

**Figure S12. Representative radio-TLC traces from  $^{225}\text{Ac}^{3+}$  radiolabeling of DOTA using TLC system B.** Reaction conditions:  $\text{NH}_4\text{OAc}$  buffer (0.5 M, pH 6), RT, 5 min, 9.3–11.1 kBq of  $^{225}\text{Ac}$ ,  $10^{-8}$ – $10^{-3}$  M DOTA,  $V_{\text{tot}} = 150 \mu\text{L}$ .

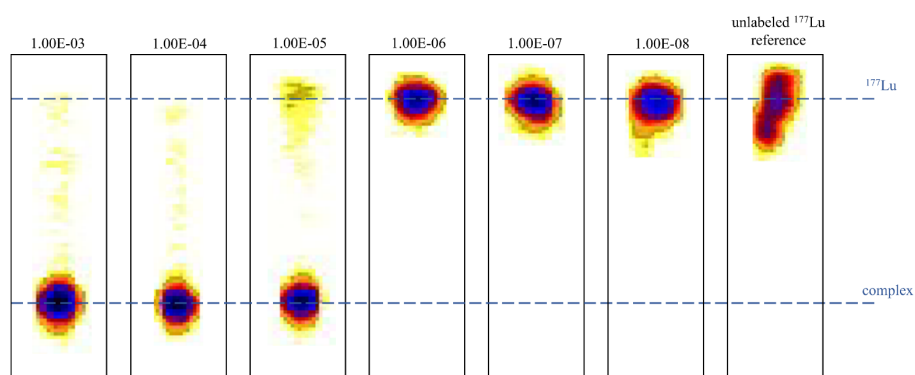

**Figure S13. Representative radio-TLC traces from  $[^{177}\text{Lu}]\text{Lu}^{3+}$  radiolabeling of PYTA using TLC system B.** Reaction conditions:  $\text{NH}_4\text{OAc}$  buffer (0.5 M, pH 6), RT, 5 min, 22–37 kBq of  $^{177}\text{Lu}$ ,  $10^{-8}$ – $10^{-3}$  M PYTA,  $V_{\text{tot}} = 150 \mu\text{L}$ .

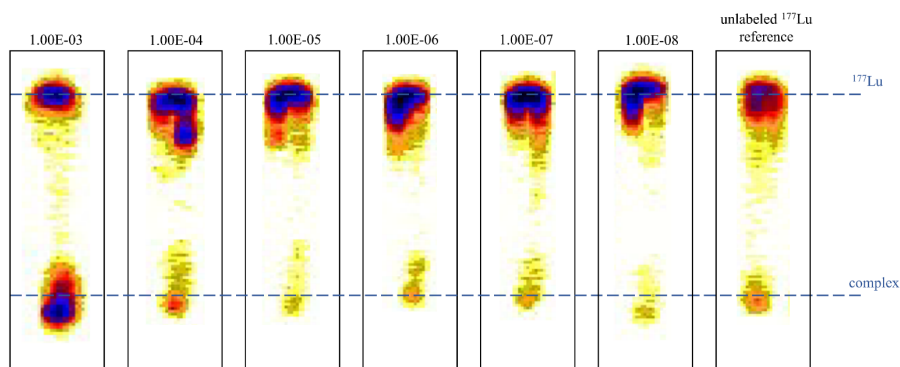

**Figure S14. Representative radio-TLC traces from  $[^{177}\text{Lu}]\text{Lu}^{3+}$  radiolabeling of macropa using TLC system A.** Reaction conditions:  $\text{NH}_4\text{OAc}$  buffer (0.5 M, pH 6), RT, 5 min, 22–37 kBq of  $^{177}\text{Lu}$ ,  $10^{-8}$ – $10^{-3}$  M macropa,  $V_{\text{tot}} = 150 \mu\text{L}$ .

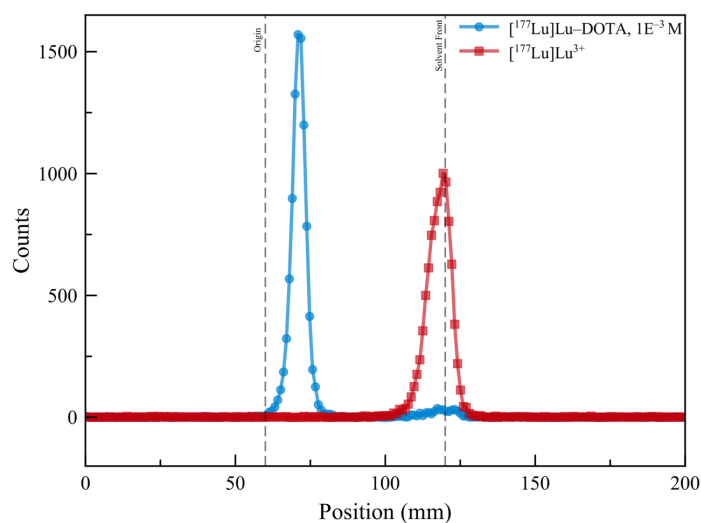

**Figure S15. Representative radio-TLC traces from  $[^{177}\text{Lu}]\text{Lu}^{3+}$  radiolabeling of DOTA using TLC system B.** Reaction conditions:  $\text{NH}_4\text{OAc}$  buffer (0.5 M, pH 6), RT, 5 min, 22–37 kBq of  $^{177}\text{Lu}$ ,  $1 \times 10^{-3}$  M DOTA,  $V_{\text{tot}} = 150 \mu\text{L}$ .

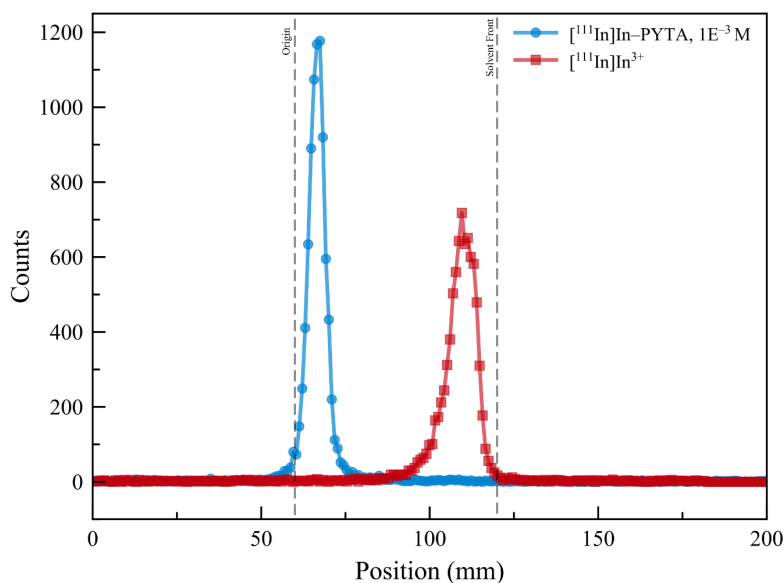

**Figure S16. Representative radio-TLC traces from  $[^{111}\text{In}]\text{In}^{3+}$  radiolabeling of PYTA using TLC system B.** Reaction conditions:  $\text{NH}_4\text{OAc}$  buffer (0.5 M, pH 6), RT, 5 min, 74–111 kBq of  $^{111}\text{In}$ ,  $1 \times 10^{-3}$  M PYTA,  $V_{\text{tot}} = 150 \mu\text{L}$ .

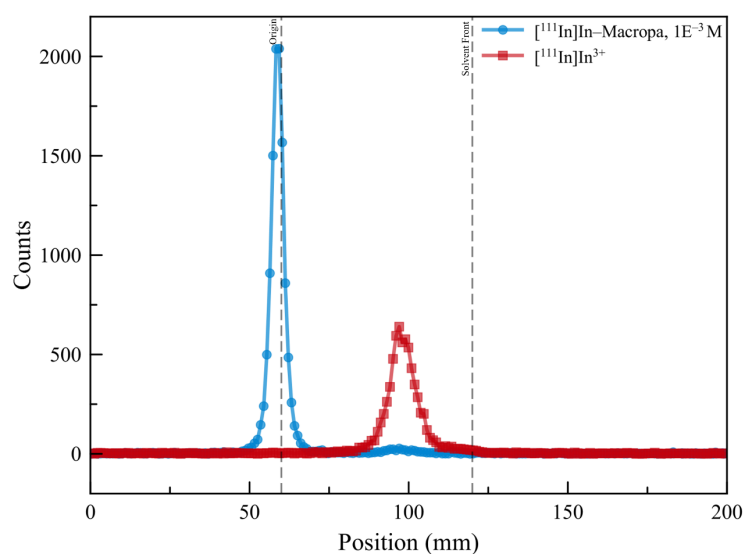

**Figure S17. Representative radio-TLC traces from  $[^{111}\text{In}]\text{In}^{3+}$  radiolabeling of macropa using TLC system B.** Reaction conditions:  $\text{NH}_4\text{OAc}$  buffer (0.5 M, pH 6), RT, 5 min, 74–111 kBq of  $^{111}\text{In}$ ,  $1 \times 10^{-3}$  M macropa,  $V_{\text{tot}} = 150 \mu\text{L}$ .

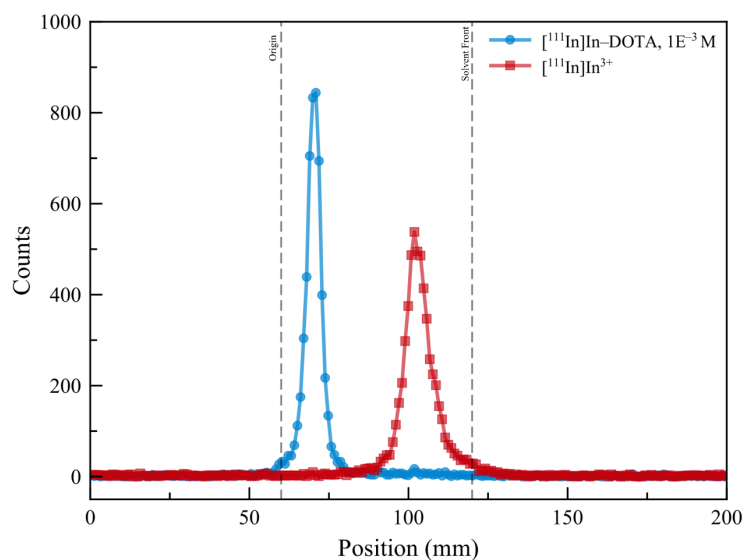

**Figure S18. Representative radio-TLC traces from  $[^{111}\text{In}]\text{In}^{3+}$  radiolabeling of DOTA using TLC system B.** Reaction conditions:  $\text{NH}_4\text{OAc}$  buffer (0.5 M, pH 6), RT, 5 min, 74–111 kBq of  $^{111}\text{In}$ ,  $1 \times 10^{-3}$  M DOTA,  $V_{\text{tot}} = 150 \mu\text{L}$ .

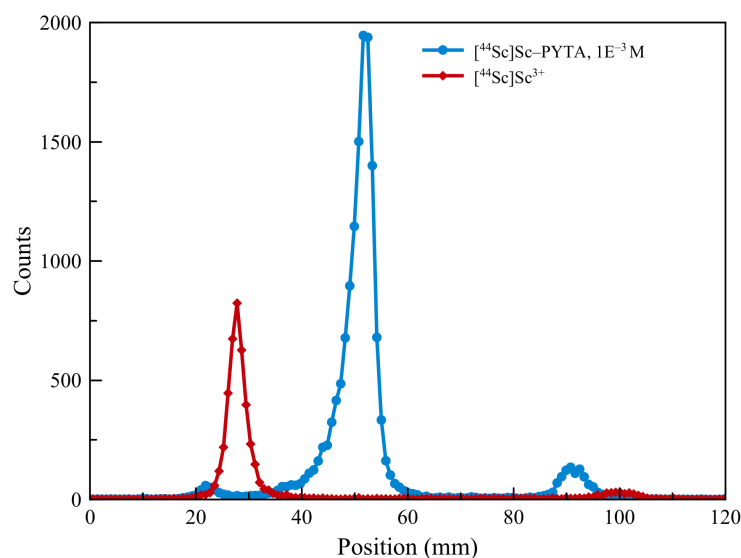

**Figure S19. Representative radio-TLC traces from  $[^{44}\text{Sc}]\text{Sc}^{3+}$  radiolabeling with PYTA using TLC system C.** Reaction conditions:  $\text{NH}_4\text{OAc}$  buffer (0.5 M, **pH 6**), RT, 5 min, 185 KBq of  $^{44}\text{Sc}$ ,  $1 \times 10^{-3}$  M PYTA,  $V_{\text{tot}} = 150 \mu\text{L}$ .

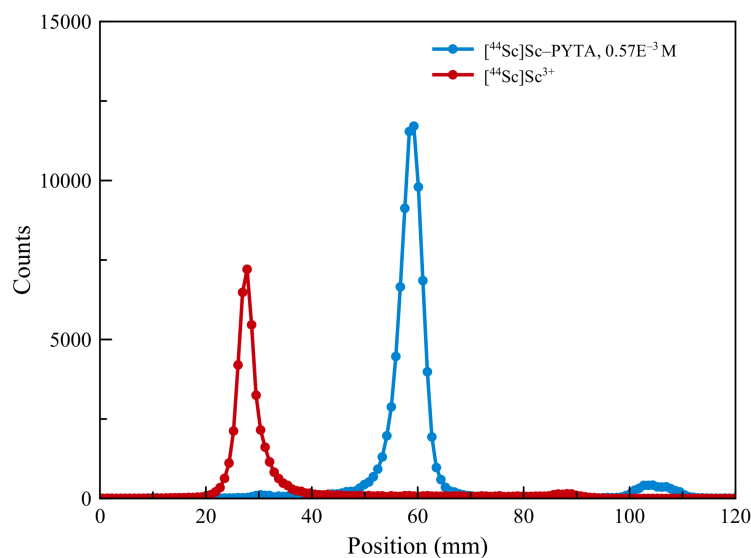

**Figure S20. Representative radio-TLC traces from  $[^{44}\text{Sc}]\text{Sc}^{3+}$  radiolabeling with PYTA using TLC system C.** Reaction conditions:  $\text{NH}_4\text{OAc}$  buffer (0.25 M, **pH 4.05**), RT, 30 min, 1.665 MBq of  $^{44}\text{Sc}$ ,  $0.57 \times 10^{-3}$  M PYTA,  $V_{\text{tot}} = 100 \mu\text{L}$ .

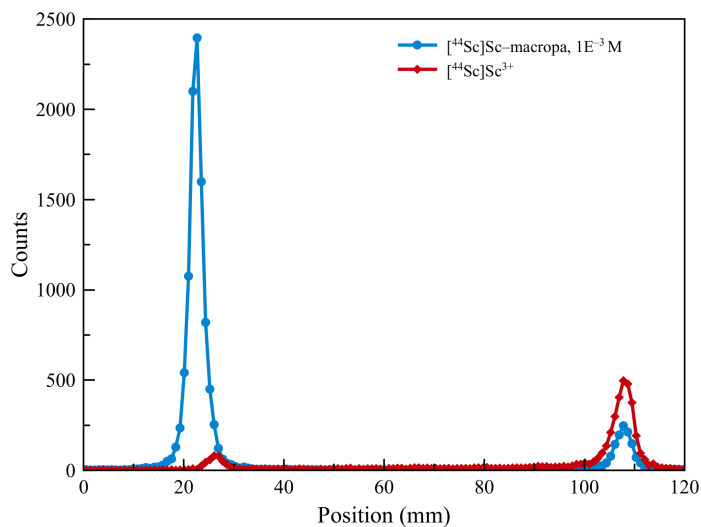

**Figure S21. Representative radio-TLC traces from  $[^{44}\text{Sc}]\text{Sc}^{3+}$  radiolabeling with macropa using TLC system D.** Reaction conditions:  $\text{NH}_4\text{OAc}$  buffer (0.5 M, pH 6), RT, 5 min, 185 kBq of  $^{44}\text{Sc}$ ,  $1 \times 10^{-3}$  M macropa,  $V_{\text{tot}} = 150 \mu\text{L}$ .

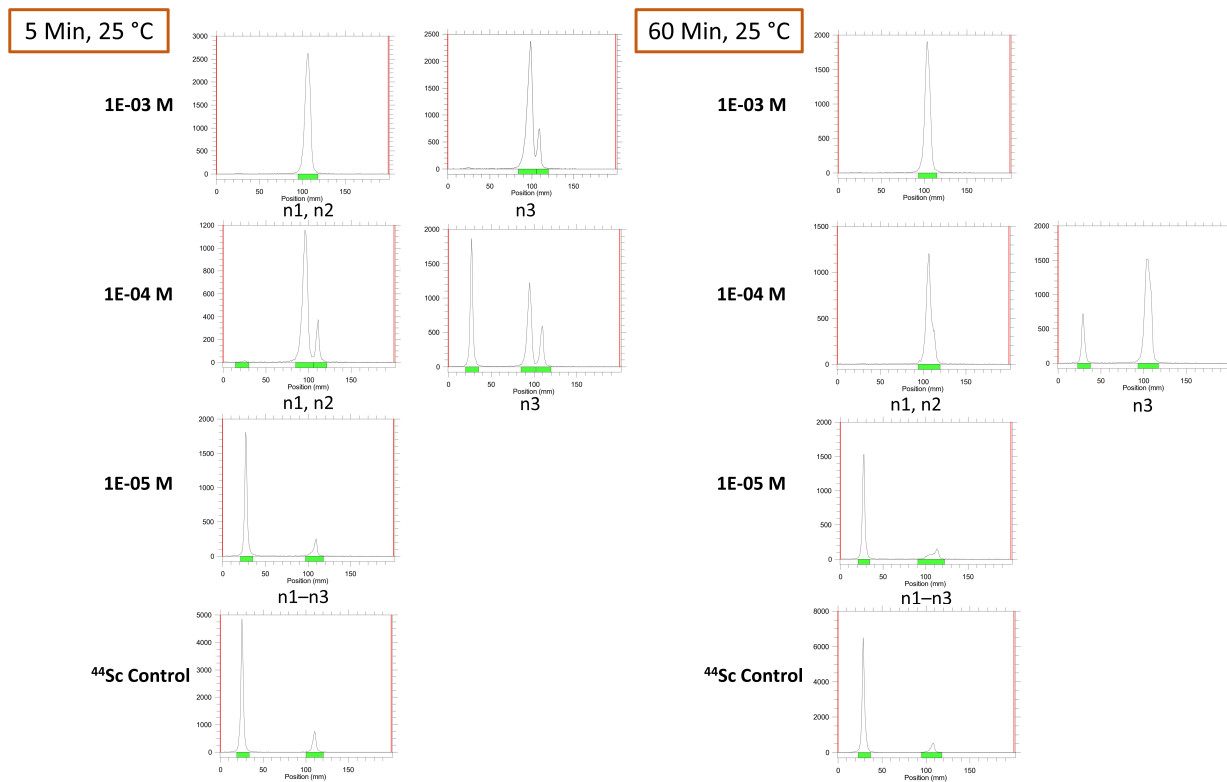

**Figure S22. Representative radio-TLC traces from  $[^{44}\text{Sc}]\text{Sc}^{3+}$  radiolabeling with DOTA (various concentrations) using TLC system E.** Reaction conditions:  $\text{NH}_4\text{OAc}$  buffer (0.5 M, pH 6), RT, 5 or 60 min, 185 kBq of  $^{44}\text{Sc}$ ,  $V_{\text{tot}} = 150 \mu\text{L}$ . At RT, even after 60 min, DOTA shows inconsistent radiolabeling. By contrast, we did not observe this variability for radiolabeling reactions at 80 °C under the same conditions.



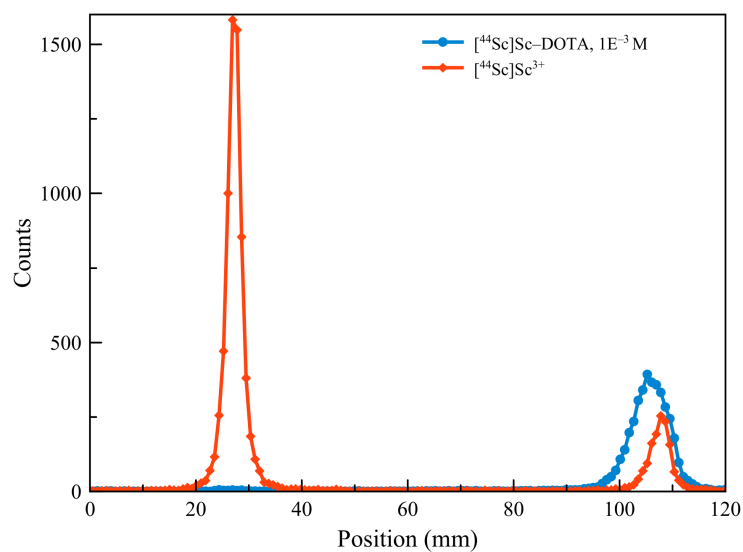

**Figure S23. Representative radio-TLC traces from  $[^{44}\text{Sc}]\text{Sc}^{3+}$  radiolabeling with DOTA using TLC system E.** Reaction conditions:  $\text{NH}_4\text{OAc}$  buffer (0.5 M, pH 6),  $80\text{ }^\circ\text{C}$ , 5 min, 185 kBq of  $^{44}\text{Sc}$ ,  $1 \times 10^{-3}\text{ M}$  DOTA,  $V_{\text{tot}} = 150\text{ }\mu\text{L}$ .

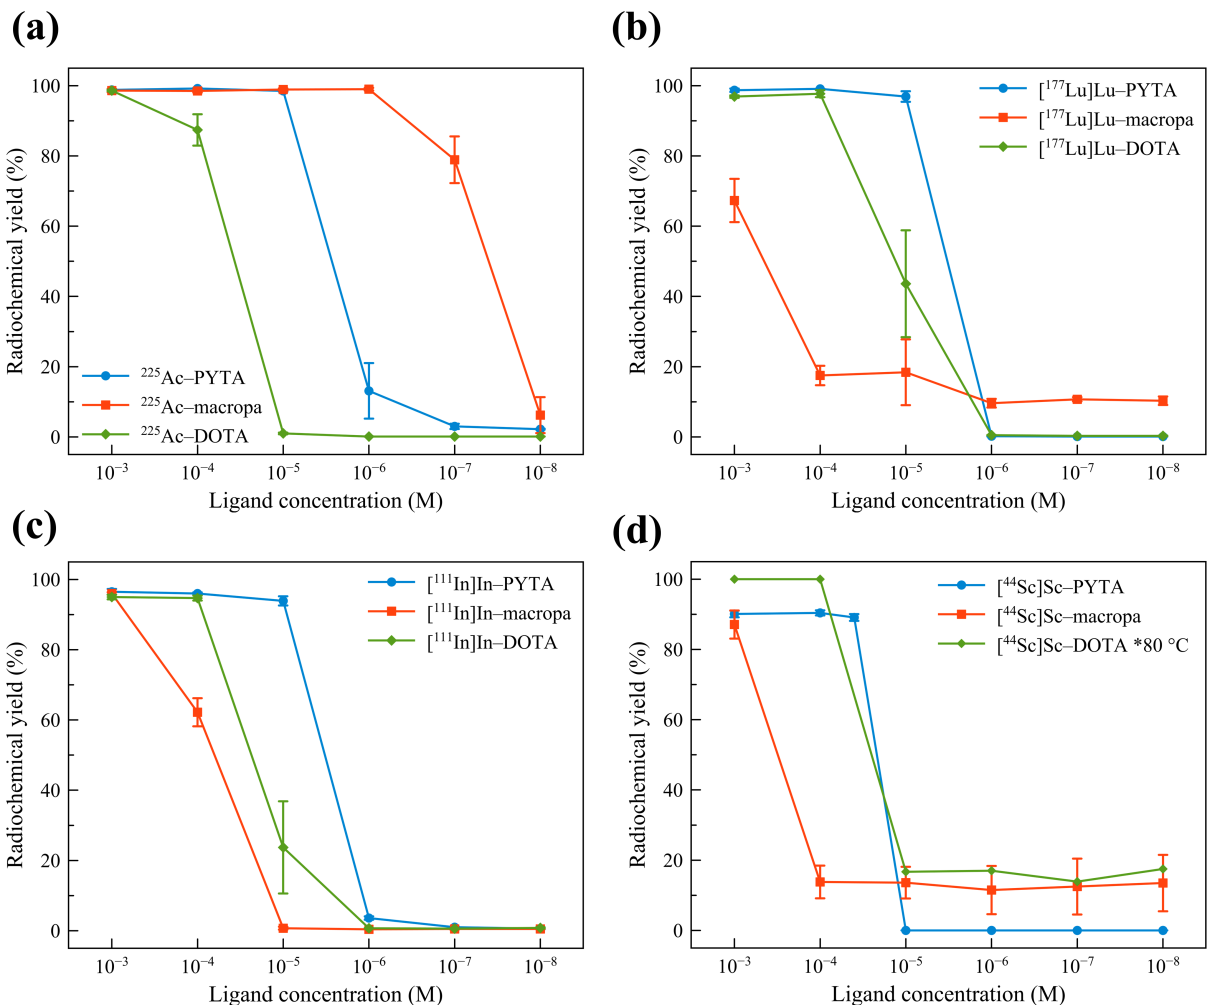

**Figure S24. Concentration-dependent radiolabeling of PYTA, macropa, and DOTA with (a)  $^{225}\text{Ac}^{3+}$  (9.3–11.1 kBq), (b)  $^{177}\text{LuLu}^{3+}$  (22–37 kBq), (c)  $^{111}\text{InIn}^{3+}$  (74–111 kBq), or (d)  $^{44}\text{ScSc}^{3+}$  (185 kBq) after 60 min reaction time. All reactions were carried out at 25 °C in  $\text{NH}_4\text{OAc}$  (0.5 M, pH 6.0),  $V_T = 150 \mu\text{L}$ , except for the  $^{44}\text{Sc}/\text{DOTA}$  radiolabeling, for which data from 80 °C experiments are shown. The error bars represent the standard deviations. Data for  $^{225}\text{Ac}$ -macropa and  $^{225}\text{Ac}$ -DOTA were reproduced from ref 20.**

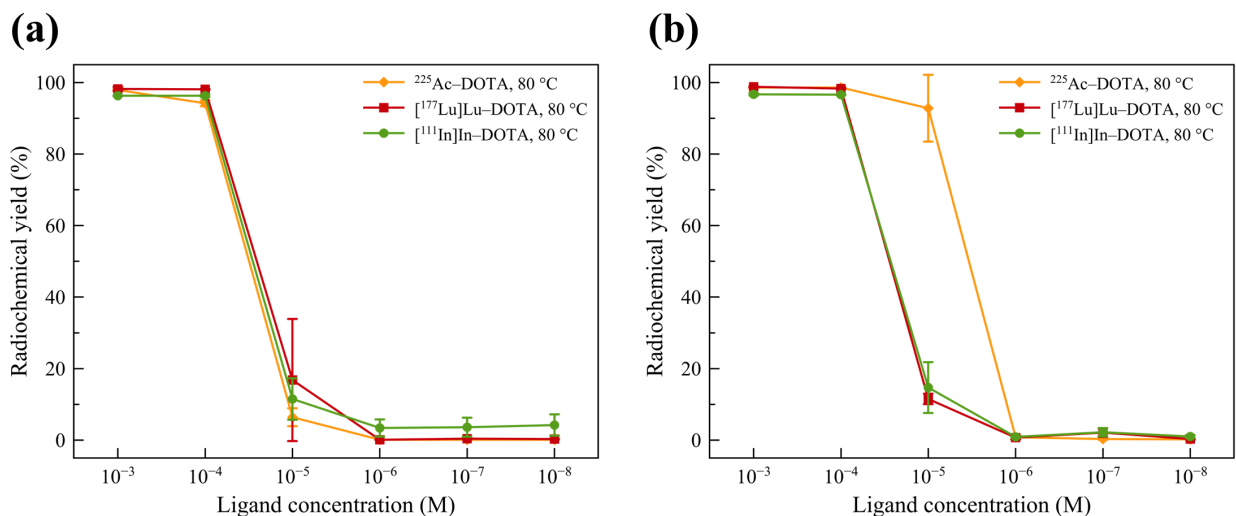

**Figure S25. Concentration-dependent radiolabeling of DOTA with  $^{225}\text{Ac}^{3+}$  (9.3–11.1 kBq),  $^{177}\text{Lu}^{3+}$  (22–37 kBq), and  $^{111}\text{In}^{3+}$  (74–111 kBq) at 80 °C after (a) 5 min or (b) 60 min reaction time. All reactions were carried out in  $\text{NH}_4\text{OAc}$  (0.5 M, pH 6.0),  $V_T = 150 \mu\text{L}$ . The error bars represent the standard deviations.**

**Table S4. TLC systems and chelator concentrations used in serum challenges.**

|                | $^{225}\text{Ac}^{3+}$ |                    |                    | $^{177}\text{Lu}^{3+}$ |                    |                    | $^{111}\text{In}^{3+}$ |                                                |                                               | $^{44}\text{Sc}^{3+}$ |                                             |                                             |
|----------------|------------------------|--------------------|--------------------|------------------------|--------------------|--------------------|------------------------|------------------------------------------------|-----------------------------------------------|-----------------------|---------------------------------------------|---------------------------------------------|
|                | TLC                    | [L] before serum   | [L] after serum    | TLC                    | [L] before serum   | [L] after serum    | TLC                    | [L] before serum                               | [L] after serum                               | TLC                   | [L] before serum                            | [L] after serum                             |
| <b>PYTA</b>    | B                      | $4 \times 10^{-5}$ | $1 \times 10^{-5}$ | B                      | $4 \times 10^{-5}$ | $1 \times 10^{-5}$ | B                      | $4 \times 10^{-5}$                             | $1 \times 10^{-5}$                            | F                     | $4 \times 10^{-5}$<br>or $4 \times 10^{-4}$ | $1 \times 10^{-5}$<br>or $1 \times 10^{-4}$ |
| <b>macropa</b> | A                      | $4 \times 10^{-5}$ | $1 \times 10^{-5}$ | A                      | $4 \times 10^{-3}$ | $1 \times 10^{-3}$ | B                      | $3.34 \times 10^{-3}$<br>or $4 \times 10^{-4}$ | $8.4 \times 10^{-4}$<br>or $1 \times 10^{-4}$ | –                     | –                                           | –                                           |
| <b>DOTA</b>    | B                      | $4 \times 10^{-5}$ | $1 \times 10^{-5}$ | B                      | $4 \times 10^{-4}$ | $1 \times 10^{-4}$ | B                      | $4 \times 10^{-4}$                             | $1 \times 10^{-4}$                            | –                     | –                                           | –                                           |

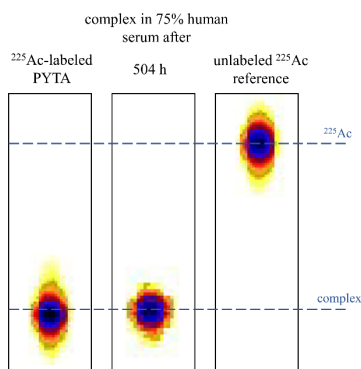

**Figure S26. Representative radio-TLC traces (TLC system B) from experiments challenging  $^{225}\text{Ac}$ -PYTA with human serum. Reaction conditions: 75% human serum, 25%  $\text{NH}_4\text{OAc}$  buffer (0.5 M, pH 6), 37 °C, 37 kBq of  $^{225}\text{Ac}$ ,  $V_{\text{tot}} = 600 \mu\text{L}$ .**

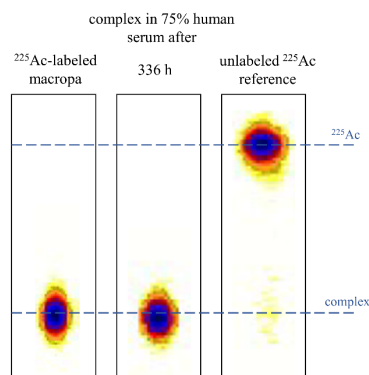

**Figure S27. Representative radio-TLC traces (TLC system A) from experiments challenging  $^{225}\text{Ac}$ -macropa with human serum.** Reaction conditions: 75% human serum, 25%  $\text{NH}_4\text{OAc}$  buffer (0.5 M, pH 6), 37 °C, 37 kBq of  $^{225}\text{Ac}$ ,  $V_{\text{tot}} = 600 \mu\text{L}$ . Figure taken from ref 20.

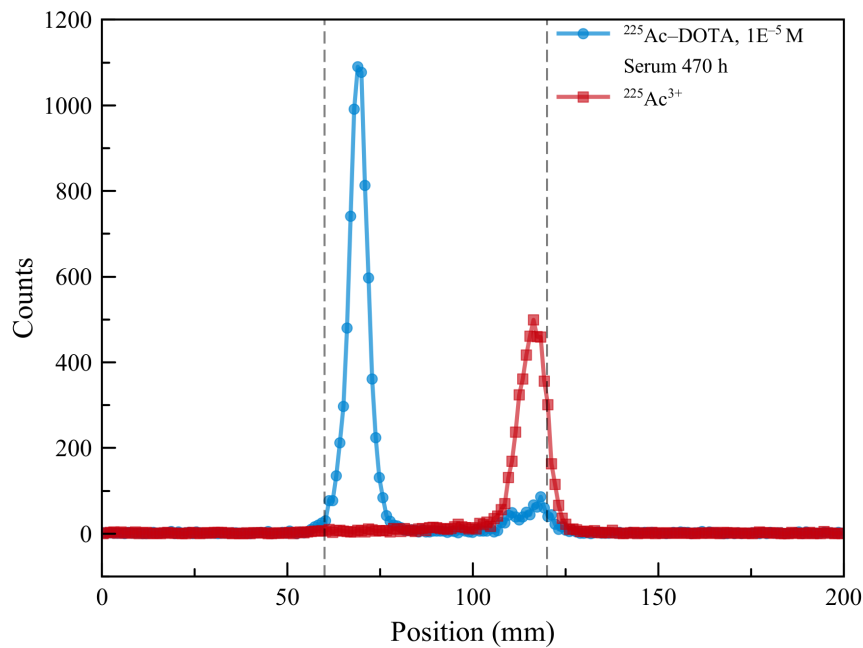

**Figure S28. Representative radio-TLC traces (TLC system B) from experiments challenging  $^{225}\text{Ac}$ -DOTA with human serum.** Reaction conditions: 75% human serum, 25%  $\text{NH}_4\text{OAc}$  buffer (0.5 M, pH 6), 37 °C, 37 kBq of  $^{225}\text{Ac}$ ,  $V_{\text{tot}} = 600 \mu\text{L}$ .

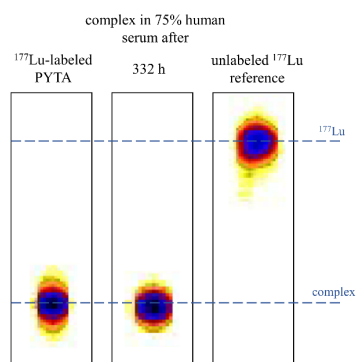

**Figure S29. Representative radio-TLC traces (TLC system B) from experiments challenging  $^{177}\text{Lu}$ -PYTA with human serum.** Reaction conditions: 75% human serum, 25%  $\text{NH}_4\text{OAc}$  buffer (0.5 M, pH 6), 37 °C, 148 kBq of  $^{177}\text{Lu}$ ,  $V_{\text{tot}} = 600 \mu\text{L}$ .

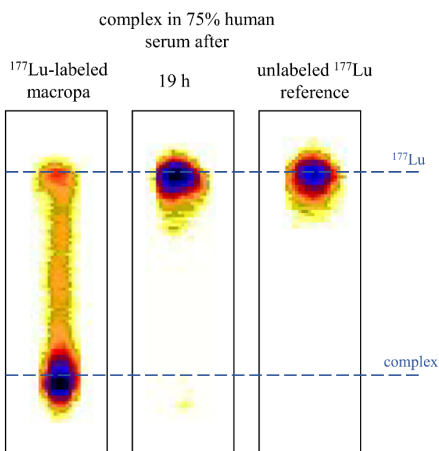

**Figure S30. Representative radio-TLC traces (TLC system A) from experiments challenging  $^{177}\text{Lu}$ -macropa with human serum.** Reaction conditions: 75% human serum, 25%  $\text{NH}_4\text{OAc}$  buffer (0.5 M, pH 6), 37 °C, 148 kBq of  $^{177}\text{Lu}$ ,  $V_{\text{tot}} = 600 \mu\text{L}$ .

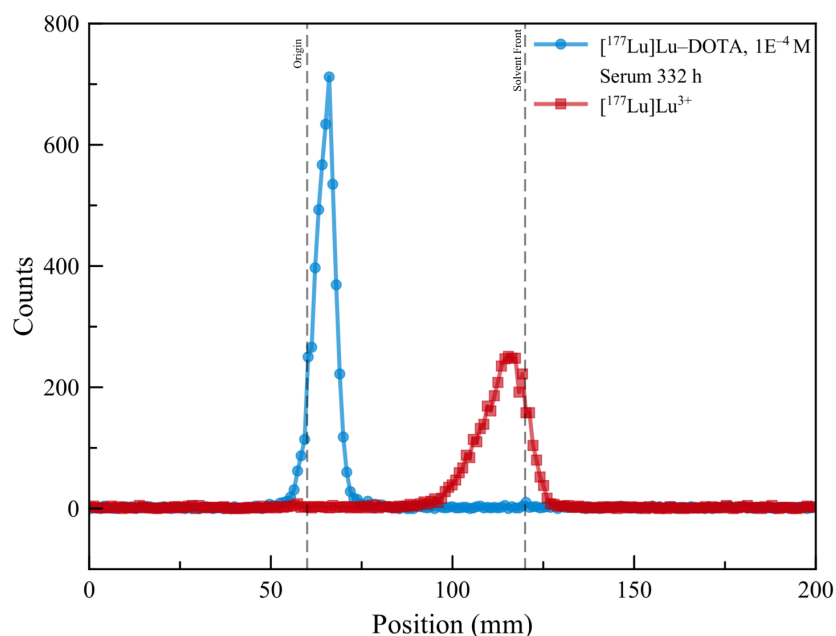

**Figure S31. Representative radio-TLC traces (TLC system B) from experiments challenging  $[^{177}\text{Lu}]\text{Lu-DOTA}$  with human serum.** Reaction conditions: 75% human serum, 25%  $\text{NH}_4\text{OAc}$  buffer (0.5 M, pH 6), 37 °C, 148 kBq of  $^{177}\text{Lu}$ ,  $V_{\text{tot}} = 600 \mu\text{L}$ .

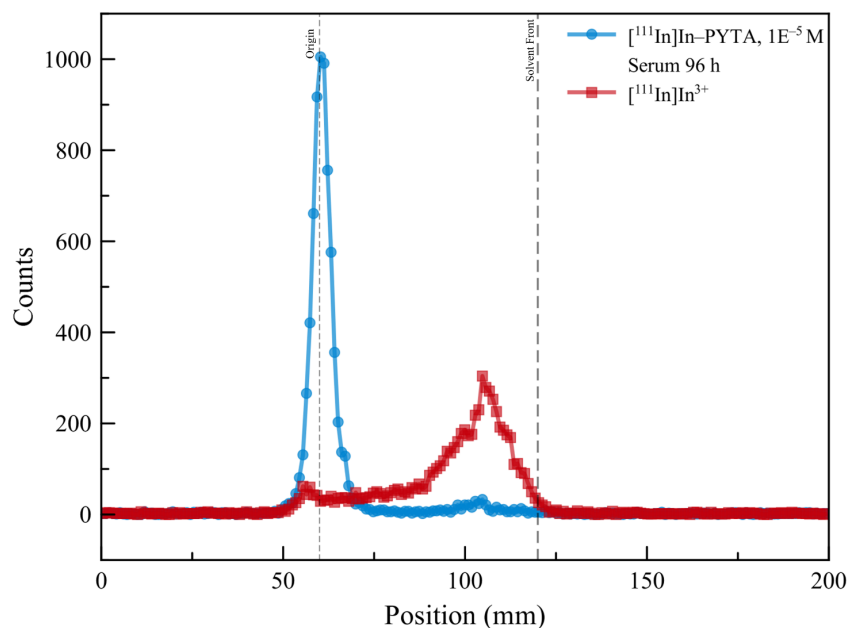

**Figure S32. Representative radio-TLC traces (TLC system B) from experiments challenging  $[^{111}\text{In}]\text{In-PYTA}$  with human serum.** Reaction conditions: 75% human serum, 25%  $\text{NH}_4\text{OAc}$  buffer (0.5 M, pH 6), 37 °C, 185–296 kBq of  $^{111}\text{In}$ ,  $V_{\text{tot}} = 600 \mu\text{L}$ .

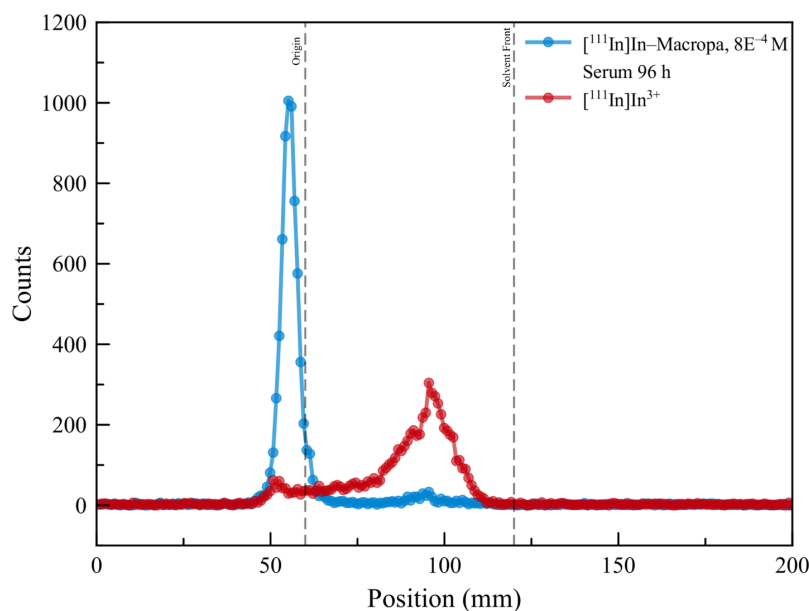

**Figure S33. Representative radio-TLC traces (TLC system B) from experiments challenging  $[^{111}\text{In}]\text{In-macropa}$  with human serum.** Reaction conditions: 75% human serum, 25%  $\text{NH}_4\text{OAc}$  buffer (0.5 M, pH 6), 37 °C, 185–296 kBq of  $^{111}\text{In}$ ,  $V_{\text{tot}} = 600 \mu\text{L}$ . Final concentration of macropa =  $8.4 \times 10^{-4}$  M.

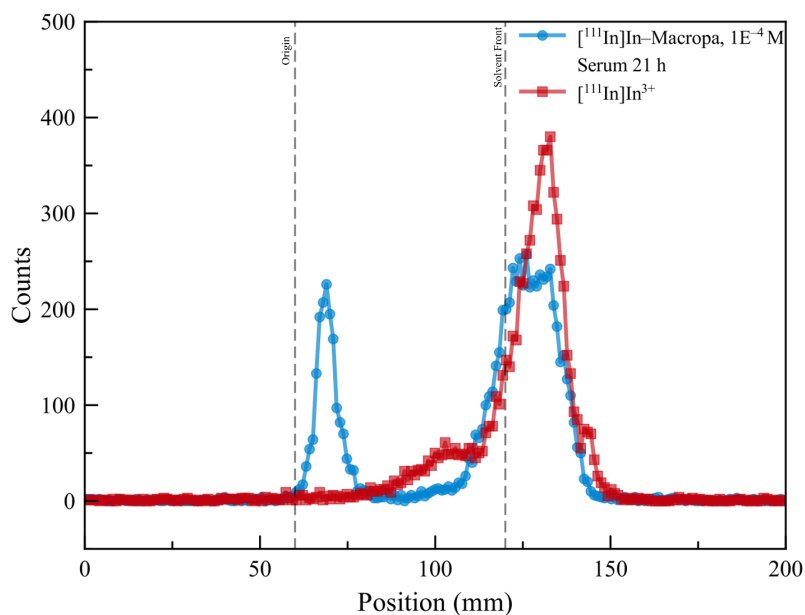

**Figure S34. Representative radio-TLC traces (TLC system B) from experiments challenging  $[^{111}\text{In}]\text{In-macropa}$  with human serum.** Reaction conditions: 75% human serum, 25%  $\text{NH}_4\text{OAc}$  buffer (0.5 M, pH 6), 37 °C, 185–296 kBq of  $^{111}\text{In}$ ,  $V_{\text{tot}} = 600 \mu\text{L}$ . Final concentration of macropa =  $1 \times 10^{-4}$  M.

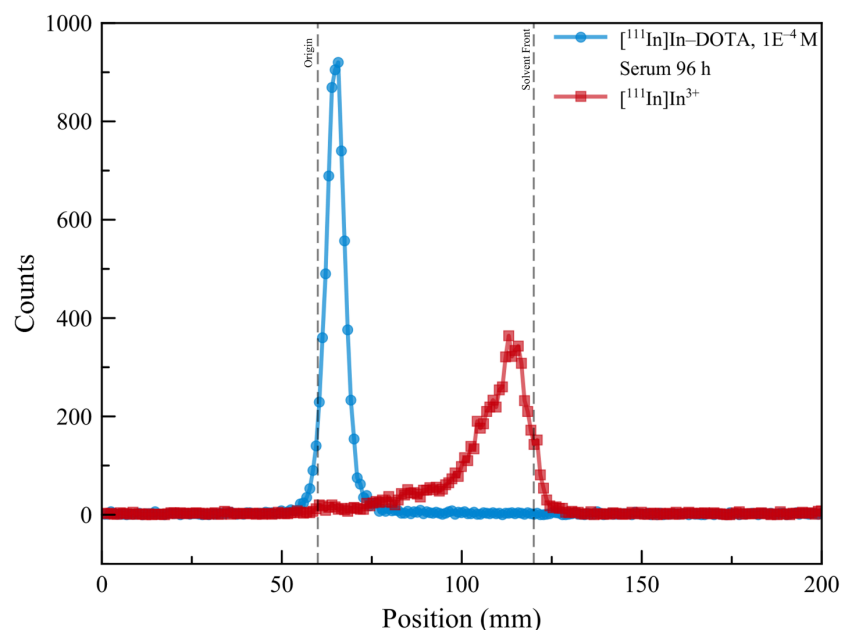

**Figure S35. Representative radio-TLC traces (TLC system B) from experiments challenging  $[^{111}\text{In}]\text{In-DOTA}$  with human serum.** Reaction conditions: 75% human serum, 25%  $\text{NH}_4\text{OAc}$  buffer (0.5 M, pH 6), 37 °C, 185–296 kBq of  $^{111}\text{In}$ ,  $V_{\text{tot}} = 600 \mu\text{L}$ .

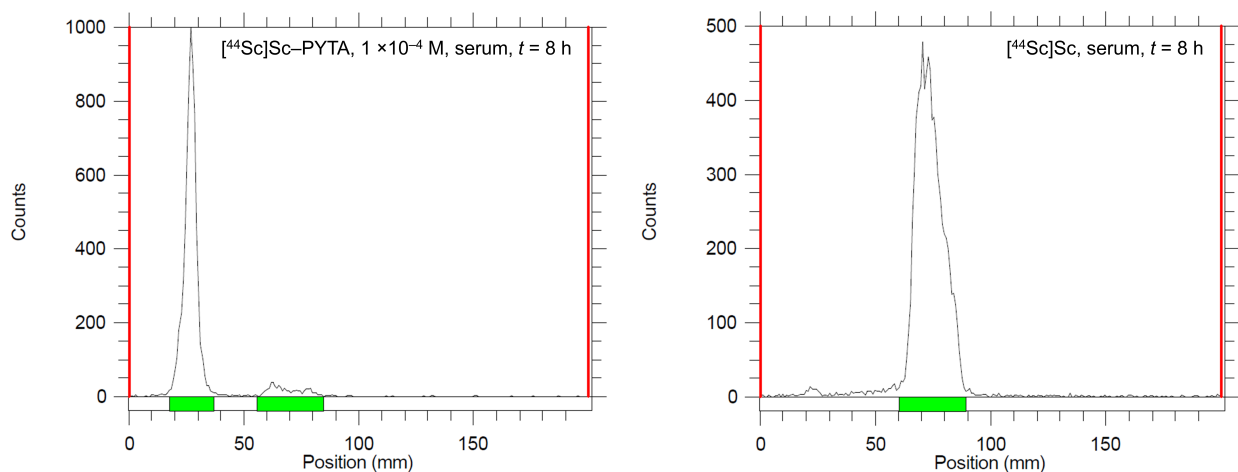

**Figure S36. Representative radio-TLC traces (TLC system X) from experiments challenging  $[^{44}\text{Sc}]\text{Sc-PYTA}$  with human serum.** Reaction conditions: 75% human serum, 25%  $\text{NH}_4\text{OAc}$  buffer (0.5 M, pH 6), 37 °C, 740 kBq of  $^{44}\text{Sc}$ ,  $V_{\text{tot}} = 600 \mu\text{L}$ . Final concentration of PYTA =  $1 \times 10^{-4}$  M.



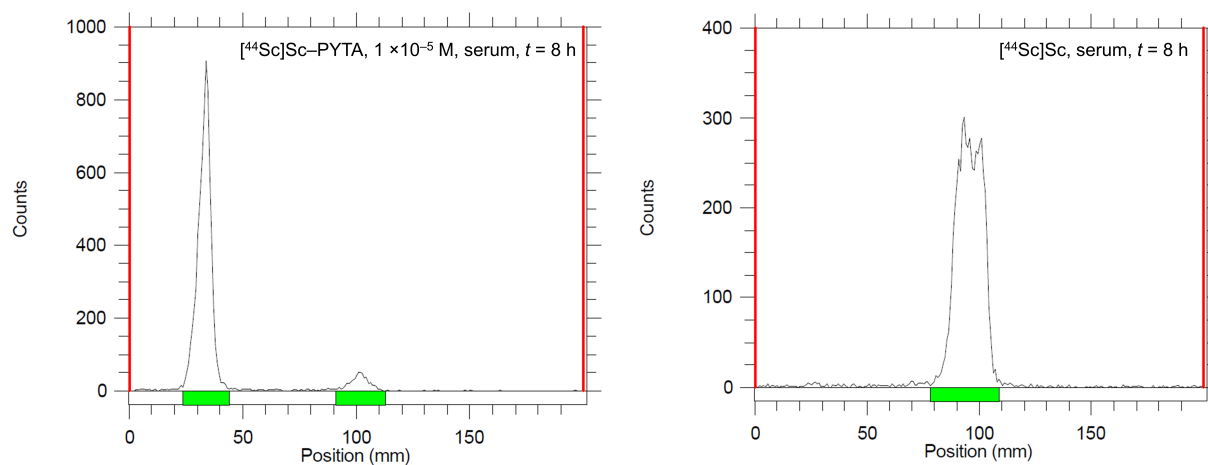

**Figure S37. Representative radio-TLC traces (TLC system X) from experiments challenging [<sup>44</sup>Sc]Sc-PYTA with human serum.** Reaction conditions: 75% human serum, 25% NH<sub>4</sub>OAc buffer (0.5 M, pH 6), 37 °C, 740 kBq of <sup>44</sup>Sc, V<sub>tot</sub> = 600 μL. Final concentration of PYTA = 1 × 10<sup>-5</sup> M.

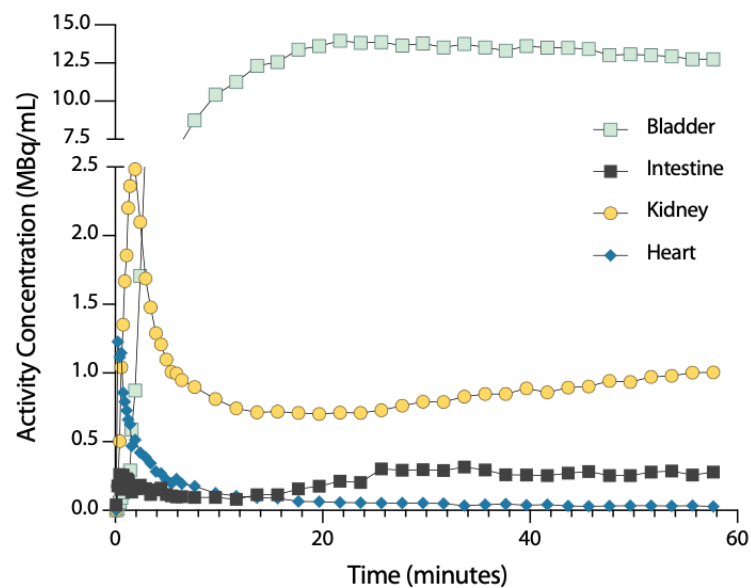

**Figure S38. Volumes of interest (VOI) analysis of dynamic PET imaging of  $[^{44}\text{Sc}]\text{Sc-PYTA}$ .**

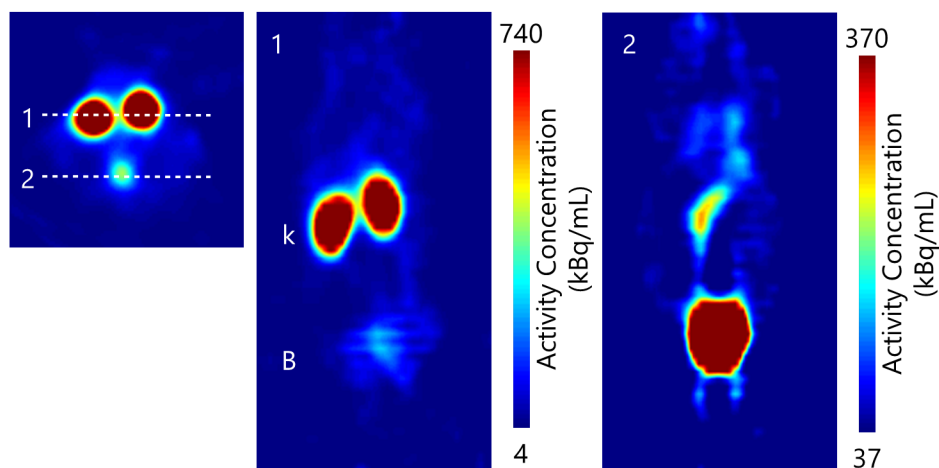

**Figure S39. 2D quantitative slices of PET images of  $[^{44}\text{Sc}]\text{Sc-PYTA}$  at  $t = 60$  min, showing (plane 1) kidney and (plane 2) gut uptake and bladder clearance.**

**Table S5.** Organ distribution of [<sup>44</sup>Sc]Sc–PYTA after intravenous injection in mice (%ID/g).

| t = 15 min    | n1       | n2       | n3       | n4       |
|---------------|----------|----------|----------|----------|
| Blood         | 3.740672 | 2.870511 | 5.447241 | 3.358018 |
| Heart         | 1.829624 | 1.260428 | 1.542745 | 1.202436 |
| Lungs         | 2.197085 | 2.417542 | 2.62914  | 2.160869 |
| Liver         | 2.075453 | 2.104218 | 3.173952 | 2.100306 |
| Spleen        | 1.011196 | 0.754526 | 1.150906 | 0.744143 |
| Kidney        | 10.9922  | 7.42735  | 15.35408 | 7.591421 |
| Stomach       | 0.851508 | 0.660415 | 2.018993 | 2.144943 |
| Lg. Intestine | 0.978884 | 0.769048 | 1.560475 | 1.185254 |
| Muscle        | 1.19184  | 1.34957  | 0.926328 | 1.152549 |
| Fat           | 0.372447 | 1.267682 | 0.569906 | 0.498061 |
| Calvaria      | 2.358495 | 1.476982 | 1.756608 | 1.170077 |
| Brain         | 0.155457 | 0.162442 | 0.276136 | 0.154281 |

| t = 1 h       | n1       | n2       | n3       | n4       |
|---------------|----------|----------|----------|----------|
| Blood         | 0.109118 | 0.185081 | 0.175089 | 0.155051 |
| Heart         | 0.078047 | 0.094829 | 0.099297 | 0.0784   |
| Lungs         | 0.137734 | 0.147641 | 0.208895 | 0.136081 |
| Liver         | 0.142965 | 0.235978 | 0.143774 | 0.15732  |
| Spleen        | 0.092164 | 0.08886  | 0.10343  | 0.090316 |
| Kidney        | 23.21309 | 1.522468 | 1.478234 | 4.257172 |
| Stomach       | 0.152447 | 0.156897 | 0.228015 | 0.068241 |
| Lg. Intestine | 0.114878 | 0.081181 | 0.065488 | 0.069404 |
| Muscle        | 0.076811 | 0.096078 | 0.054596 | 0.049649 |
| Fat           | 0.907396 | 0.032577 | 0.035763 | 0.036914 |
| Calvaria      | 0.181434 | 0.237983 | 0.322224 | 0.186745 |
| Brain         | 0.027033 | 0.032088 | 0.043893 | 0.065779 |

| t = 4 h       | n1       | n2       | n3       | n4       |
|---------------|----------|----------|----------|----------|
| Blood         | 0.042119 | 0.041018 | 0.038674 | 0.053364 |
| Heart         | 0.042844 | 0.053032 | 0.036666 | 0.045187 |
| Lungs         | 0.041294 | 0.040158 | 0.042127 | 0.044061 |
| Liver         | 0.078102 | 0.063846 | 0.054529 | 0.069627 |
| Spleen        | 0.079473 | 0.059053 | 0.05195  | 0.081098 |
| Kidney        | 1.038842 | 0.781203 | 0.656854 | 0.963115 |
| Stomach       | 0.601321 | 0.146043 | 0.299731 | 0.692344 |
| Lg. Intestine | 9.728082 | 1.341974 | 7.293979 | 10.60601 |
| Muscle        | 0.056514 | 0.045633 | 0.041528 | 0.033938 |
| Fat           | 0.025782 | 0.020914 | 0.017206 | 0.033765 |
| Calvaria      | 0.12483  | 1.358133 | 0.225513 | 0.240393 |
| Brain         | 0.019922 | 0.067867 | 0.042717 | 0.019529 |

**Table S6.** Organ distribution of  $^{225}\text{Ac}$ -PYTA after intravenous injection in mice (%ID/g).

| <b>t = 15 min</b> | <b>n1</b> | <b>n2</b> | <b>n3</b> | <b>n4</b> |
|-------------------|-----------|-----------|-----------|-----------|
| Blood             | 1.173272  | 1.21113   | 0.67148   | 1.500477  |
| Heart             | 0.351432  | 0.431206  | 0.397345  | 1.286487  |
| Lungs             | 0.521298  | 0.673906  | 0.929379  | 1.262782  |
| Liver             | 0.77467   | 0.893213  | 0.739594  | 1.014385  |
| Spleen            | 0.165084  | 0         | 0.417035  | 0.267267  |
| Kidneys           | 2.040084  | 2.532671  | 2.129184  | 5.143537  |
| Stomach           | 0.082587  | 0.236874  | 0.239382  | 1.84617   |
| Lg. Intestine     | 0.114593  | 0.278554  | 0.370487  | 0.316469  |
| Muscle            | 0.194934  | 0.201244  | 0.374455  | 0.370234  |
| Fat               | 0.148751  | 0.063538  | 0.201985  | 0.129948  |
| Skin              | 0.515429  | 0.472025  | 1.133798  | 0.952285  |
| Calvaria          | 0.298396  | 0.205208  | 0.065161  | 0.317577  |
| Brain             | 0.057892  | 0.017167  | 0.037416  | 0.234219  |
| <b>t = 1 h</b>    | <b>n1</b> | <b>n2</b> | <b>n3</b> | <b>n4</b> |
| Blood             | 0.198172  | 0.119656  | 0.020577  | 0.093215  |
| Heart             | 0.069758  | 0         | 0         | 0.056769  |
| Lungs             | 0.137186  | 0.134725  | 0.061418  | 0.054206  |
| Liver             | 0.086206  | 0.132574  | 0.081484  | 0.104757  |
| Spleen            | 0.073788  | 0.079669  | 0.125855  | 0.129377  |
| Kidneys           | 0.432342  | 1.184163  | 0.466559  | 0.560756  |
| Stomach           | 0.28989   | 0.019814  | 0.038091  | 0.066131  |
| Lg. Intestine     | 0         | 0.034036  | 0.017037  | 0.033469  |
| Muscle            | 0.09061   | 0.02203   | 0.012177  | 0         |
| Fat               | 0.078649  | 0         | 0.025922  | 0.051226  |
| Skin              | 0.18902   | 0.3604    | 0.03456   | 0.08164   |
| Calvaria          | 0.129643  | 0.043402  | 0         | 1.290521  |
| Brain             | 0.002493  | 0.011323  | 0.166678  | 0         |
| <b>t = 24 h</b>   | <b>n1</b> | <b>n2</b> | <b>n3</b> | <b>n4</b> |
| Blood             | 0         | 0.047524  | 0         | 0         |
| Heart             | 0         | 0.008842  | 0.043272  | 0         |
| Lungs             | 0         | 0         | 0.00668   | 0.020314  |
| Liver             | 0         | 0.003748  | 0.030623  | 0         |
| Spleen            | 0.157768  | 0.082952  | 0.070438  | 0.002567  |
| Kidneys           | 0.238479  | 0.158461  | 0.15545   | 0.20715   |
| Stomach           | 0.0000739 | 0.00806   | 0         | 0.024398  |
| Lg. Intestine     | 0.033317  | 0.077594  | 0.11109   | 0.099018  |
| Muscle            | 0         | 0.040048  | 0.071953  | 0         |
| Fat               | 0         | 0.105309  | 0.180378  | 0.386826  |
| Skin              | 0         | 0         | 0         | 0         |
| Calvaria          | 0         | 0.047676  | 0.127564  | 0         |
| Brain             | 0         | 0         | 0.02562   | 0         |
| <b>t = 48 h</b>   | <b>n1</b> | <b>n2</b> | <b>n3</b> | <b>n4</b> |
| Blood             | 0         | 0         | 0         | 0.022155  |
| Heart             | 0         | 0         | 0         | 0         |
| Lungs             | 0         | 0         | 0         | 0         |
| Liver             | 0.010188  | 0.019444  | 0         | 0         |
| Spleen            | 0         | 0.033296  | 0.033367  | 0         |
| Kidneys           | 0.082178  | 0.081183  | 0.103577  | 0.003819  |
| Stomach           | 0         | 0         | 0         | 0         |
| Lg. Intestine     | 0.060154  | 0.071331  | 0.017096  | 0.0127    |
| Muscle            | 0.027144  | 0         | 0         | 0.045711  |
| Fat               | 0         | 0.178409  | 0.047879  | 0.073222  |
| Skin              | 0.094187  | 0         | 0         | 0.304298  |
| Calvaria          | 0         | 0         | 0         | 0         |
| Brain             | 0         | 0         | 0         | 0         |

## 9. References

- 1 X. Zeng, D. Coquière, A. Alenda, E. Garrier, T. Prangé, Y. Li, O. Reinaud and I. Jabin, *Chem. Eur. J.*, 2006, **12**, 6393–6402.
- 2 M. Mato-Iglesias, A. Roca-Sabio, Z. Pálinkás, D. Esteban-Gómez, C. Platas-Iglesias, É. Tóth, A. de Blas and T. Rodríguez-Blas, *Inorg. Chem.*, 2008, **47**, 7840–7851.
- 3 A. Roca-Sabio, M. Mato-Iglesias, D. Esteban-Gómez, É. Toth, A. de Blas, C. Platas-Iglesias and T. Rodríguez-Blas, *J. Am. Chem. Soc.*, 2009, **131**, 3331–3341.
- 4 L. Valencia, J. Martinez, A. Macías, R. Bastida, R. A. Carvalho and C. F. G. C. Geraldes, *Inorg. Chem.*, 2002, **41**, 5300–5312.
- 5 G. L. Rothermel Jr., L. Miao, A. L. Hill and S. C. Jackels, *Inorg. Chem.*, 1992, **31**, 4854–4859.
- 6 G. Kresse, *J. Non-Cryst. Solids*, 1995, **192–193**, 222–229.
- 7 G. Kresse and J. Furthmüller, *Comput. Mater. Sci.*, 1996, **6**, 15–50.
- 8 P. E. Blöchl, *Phys. Rev. B*, 1994, **50**, 17953–17979.
- 9 G. Kresse and D. Joubert, *Phys. Rev. B*, 1999, **59**, 1758–1775.
- 10 J. P. Perdew, K. Burke and M. Ernzerhof, *Phys. Rev. Lett.*, 1996, **77**, 3865–3868.
- 11 S. Grimme, J. Antony, S. Ehrlich and H. Krieg, *J. Chem. Phys.*, 2010, **132**, 154104.
- 12 C. F. Macrae, P. R. Edgington, P. McCabe, E. Pidcock, G. P. Shields, R. Taylor, M. Towler and J. van de Streek, *J. Appl. Crystallogr.*, 2006, **39**, 453–457.
- 13 P. Pulay, *Chem. Phys. Lett.*, 1980, **73**, 393–398.
- 14 H. Sun, S. J. Mumby, J. R. Maple and A. T. Hagler, *J. Am. Chem. Soc.*, 1994, **116**, 2978–2987.
- 15 W. G. Hoover, *Phys. Rev. A*, 1985, **31**, 1695–1697.
- 16 S. Nosé, *J. Chem. Phys.*, 1984, **81**, 511–519.
- 17 G. M. Sheldrick, *Acta Crystallogr. Sect. C Struct. Chem.*, 2015, **71**, 3–8.
- 18 O. V. Dolomanov, L. J. Bourhis, R. J. Gildea, J. A. K. Howard and H. Puschmann, *J. Appl. Crystallogr.*, 2009, **42**, 339–341.
- 19 N. Benabdallah, H. Zhang, R. Unnerstall, A. Fears, L. Summer, M. Fassbender, B. E. Rodgers, D. Abou, V. Radchenko and D. L. J. Thorek, *EJNMMI Res.*, 2023, **13**, 17.
- 20 A. Hu, M. E. Simms, V. Kertesz, J. J. Wilson and N. A. Thiele, *Inorg. Chem.*, 2022, **61**, 12847–12855.

## 10. Appendices

### A. Chelator characterization data

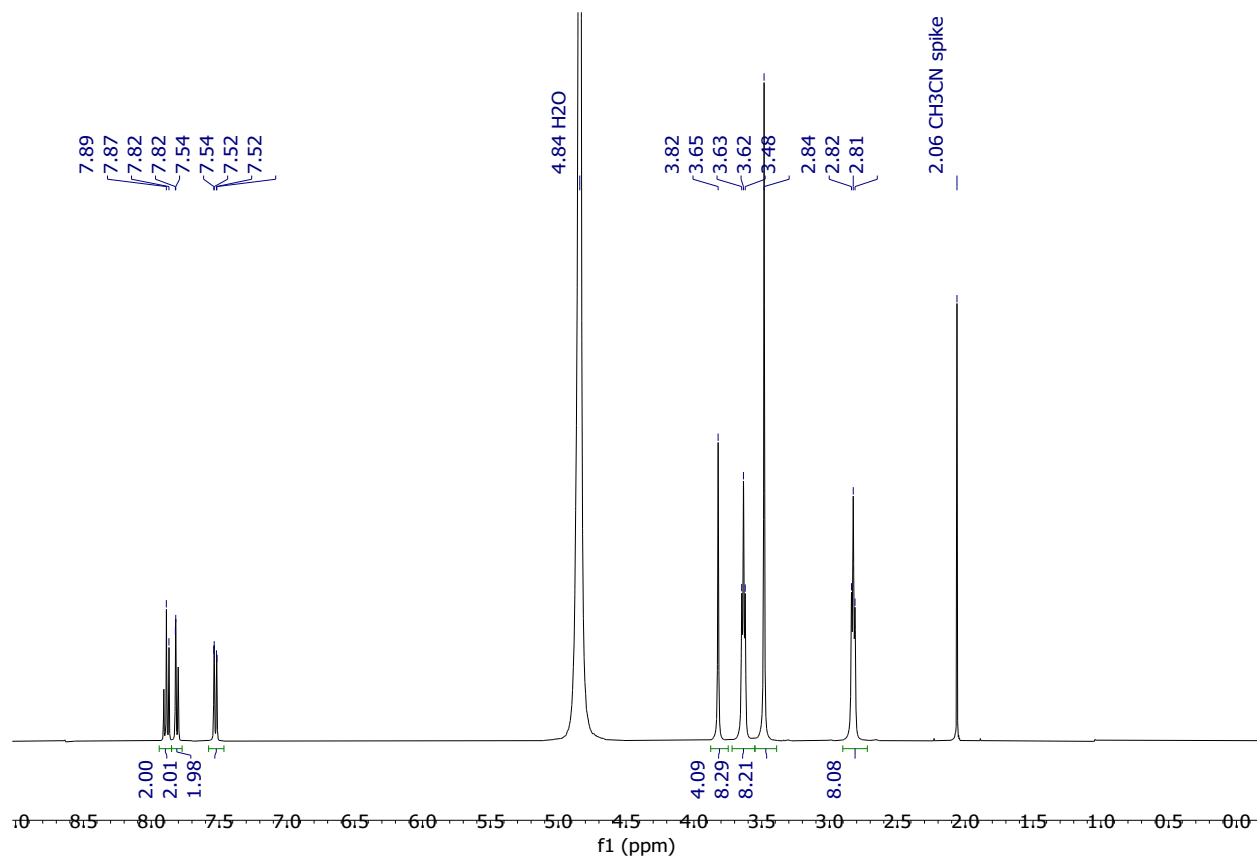

**Figure A1.** <sup>1</sup>H NMR spectrum of macropa. 400 MHz, D<sub>2</sub>O + aq. NaOH, app pD >8.

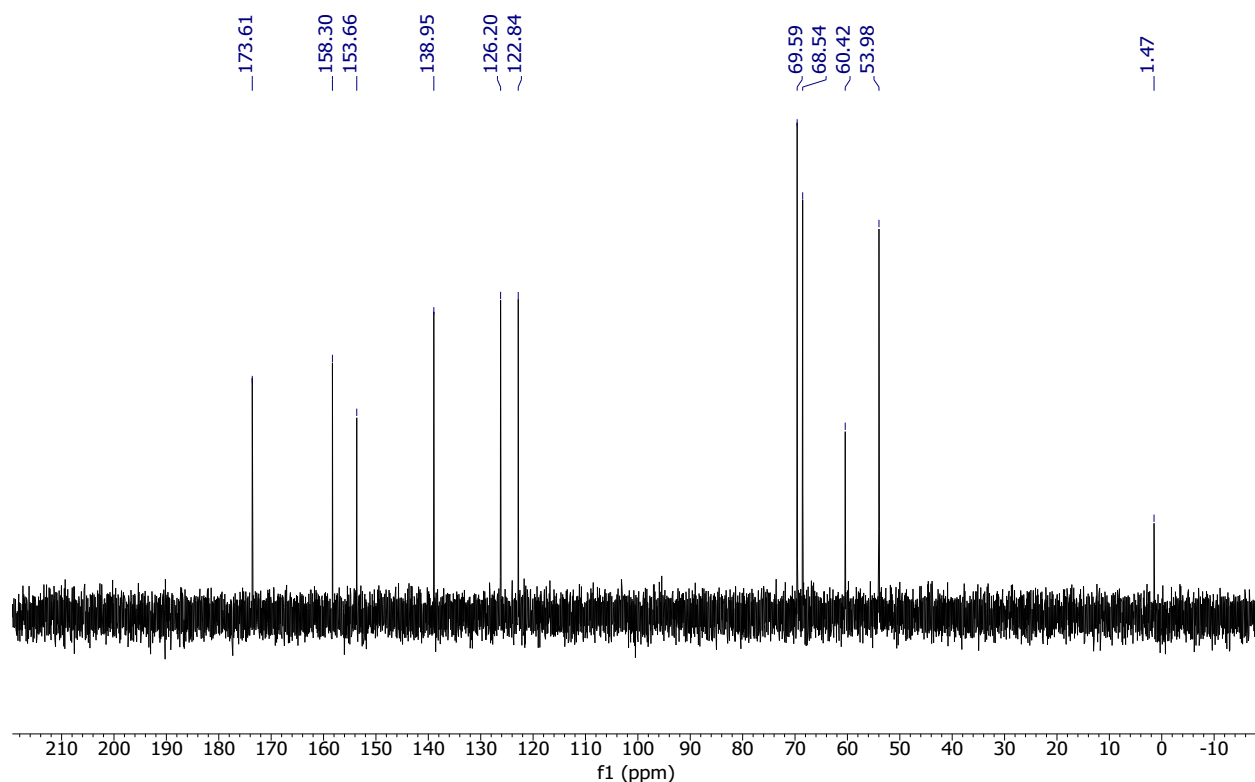

**Figure A2.**  $^{13}\text{C}\{^1\text{H}\}$  NMR spectrum of macropa. 101 MHz,  $\text{D}_2\text{O}$  + aq. NaOH, app pD >8.

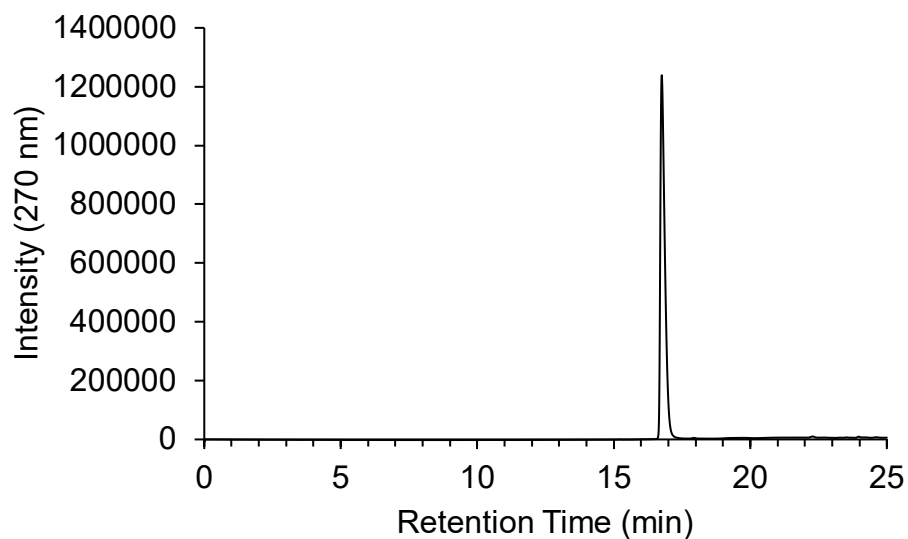

**Figure A3.** HPLC chromatogram of macropa. Retention time ( $t_R$ ) = 16.76 min using a binary MeOH/ $\text{H}_2\text{O}$  mobile phase containing 0.1% TFA (program: 10% MeOH for 5 min, followed by a linear gradient to 100% MeOH over 20 min).

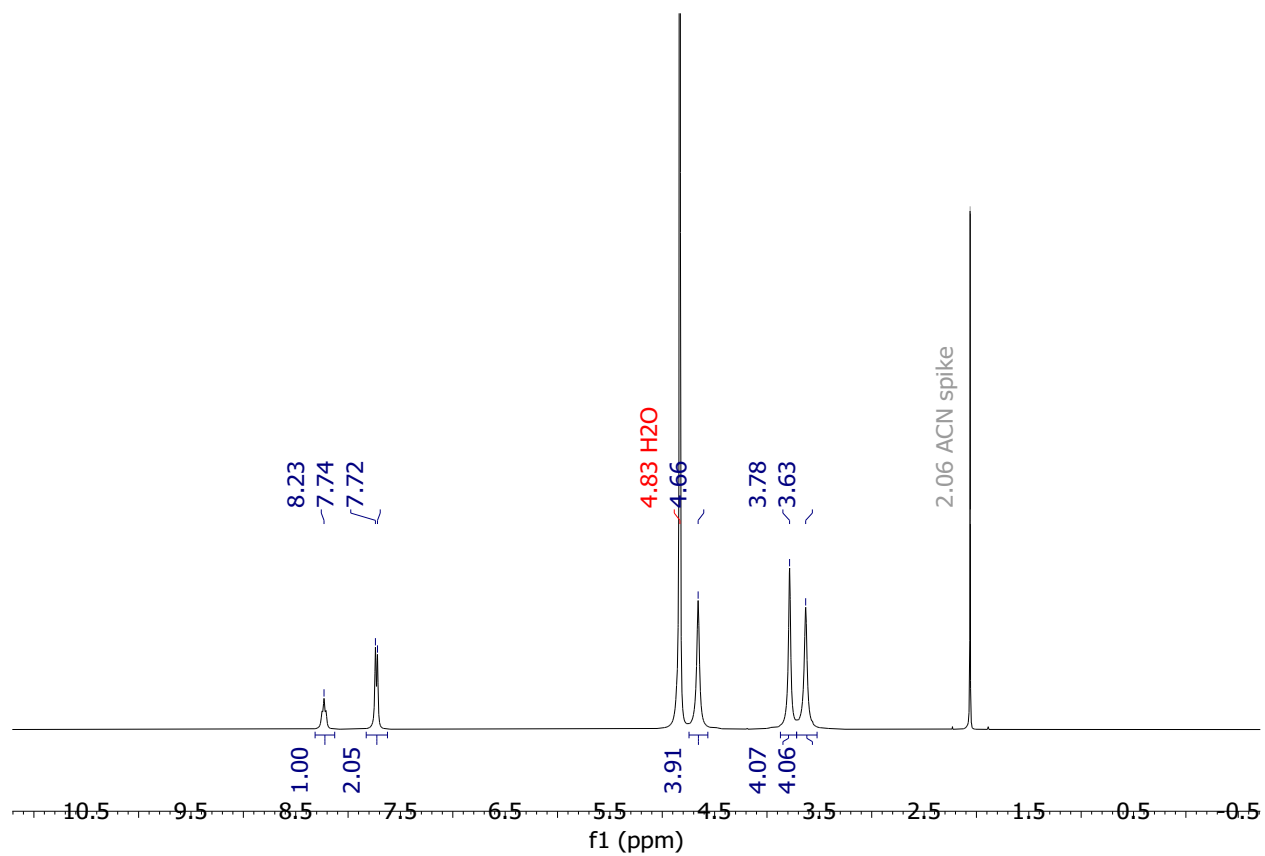

**Figure A4.**  $^1\text{H}$  NMR spectrum of PYTA. 400 MHz,  $\text{D}_2\text{O}$ , app pD 1–2 by litmus paper.



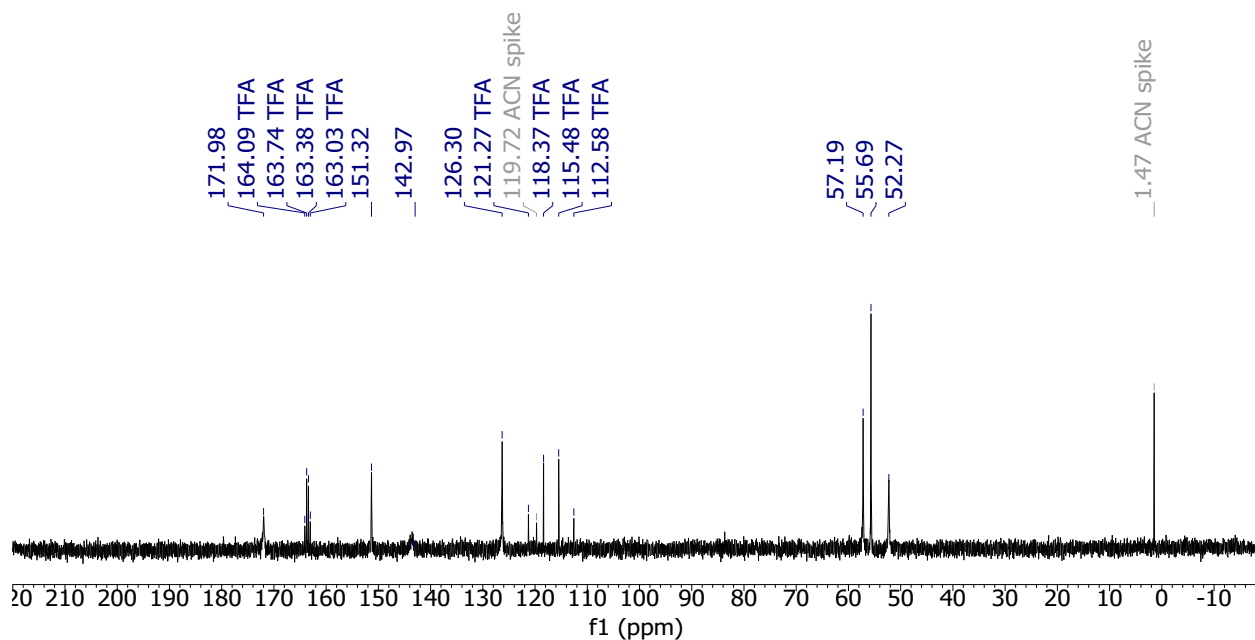

**Figure A5.**  $^{13}\text{C}\{^1\text{H}\}$  NMR spectrum of PYTA. 101 MHz,  $\text{D}_2\text{O}$ , app pD 1–2 by litmus paper.

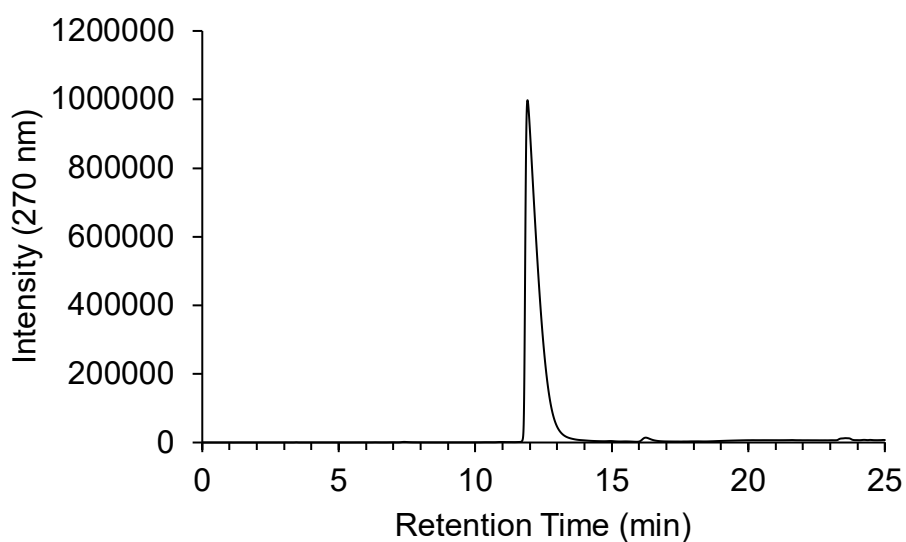

**Figure A6.** HPLC chromatogram of PYTA. Retention time ( $t_R$ ) = 11.91 min using a binary MeOH/ $\text{H}_2\text{O}$  mobile phase containing 0.1% TFA (program: 10% MeOH for 5 min, followed by a linear gradient to 100% MeOH over 20 min).

## B. HPGe gamma-ray spectra

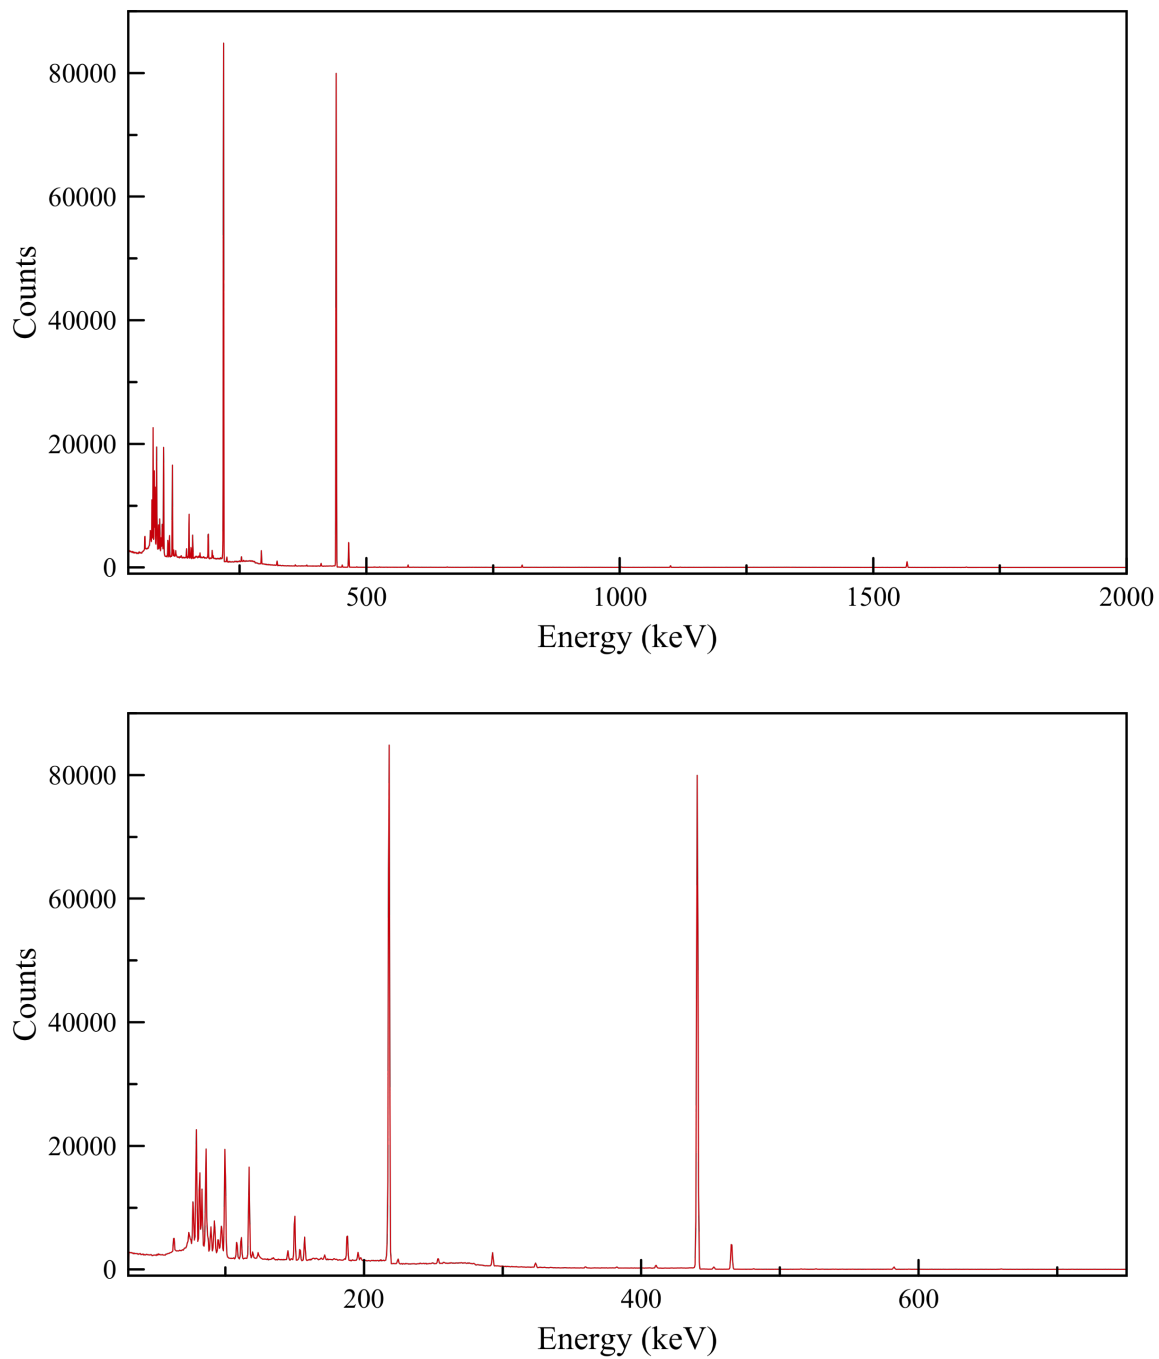

**Figure B1.** HPGe gamma-ray spectra of  $^{225}\text{Ac}$  used in this work. Top: full view. Bottom: focused view.

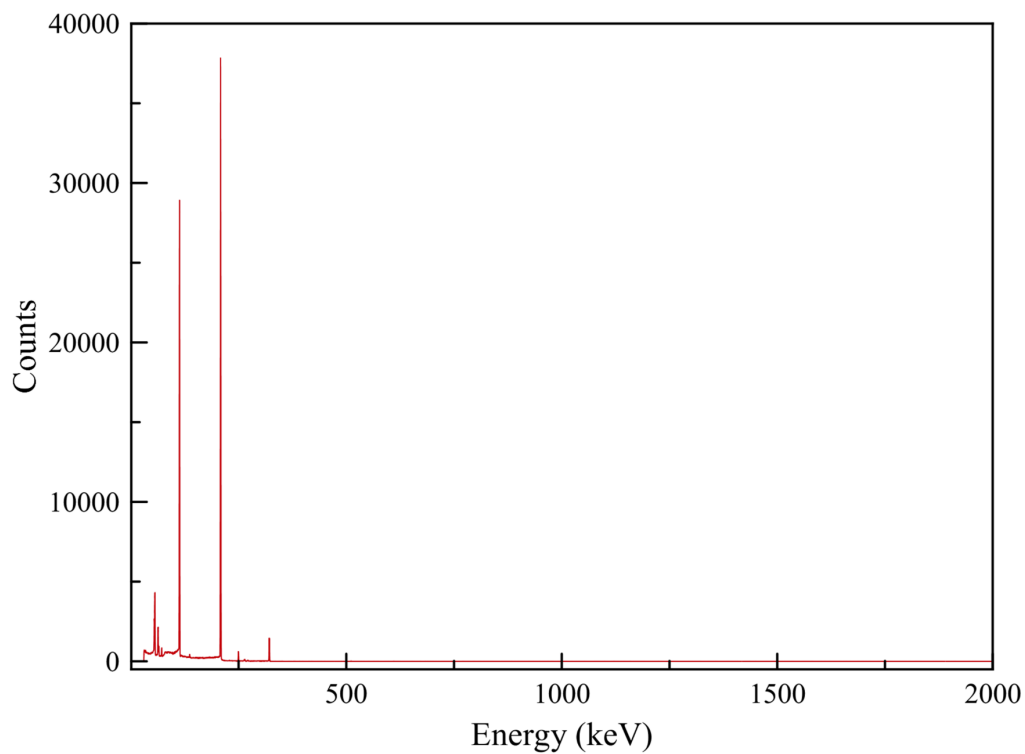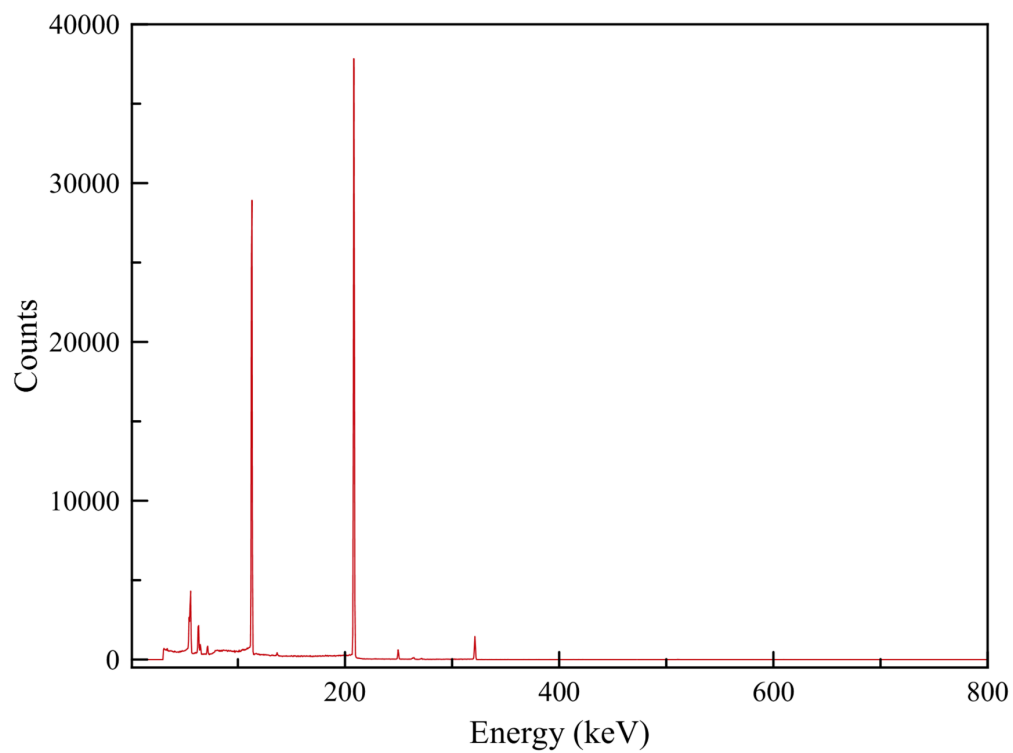

**Figure B2.** HPGe gamma-ray spectra of  $^{177}\text{Lu}$  used in this work. Top: full view. Bottom: focused view.

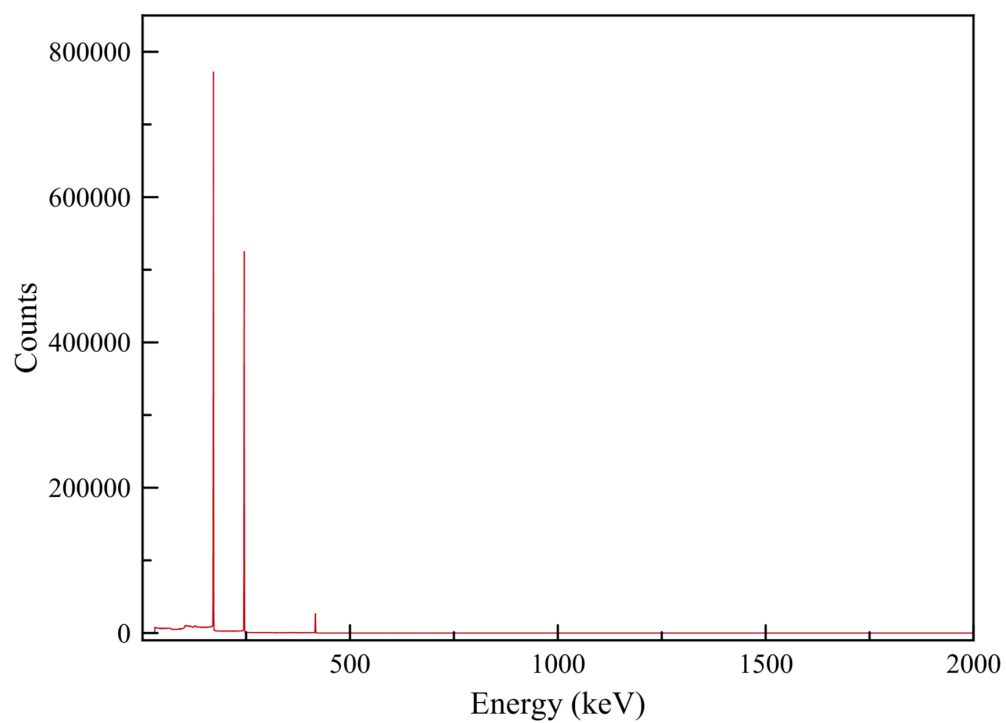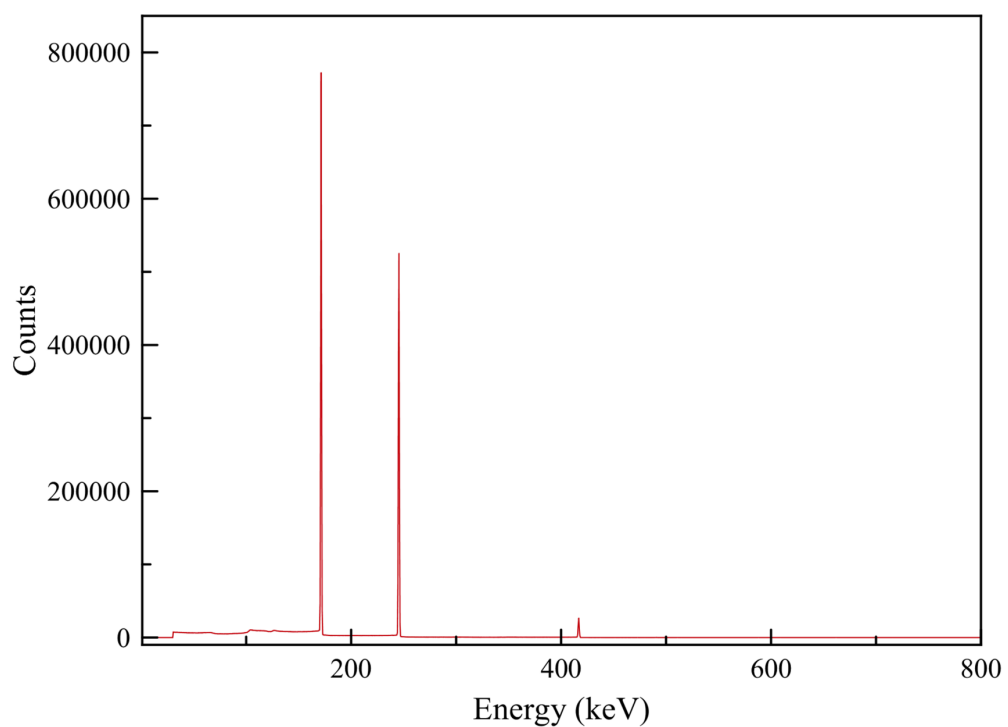

**Figure B3.** HPGe gamma-ray spectra of  $^{111}\text{In}$  used in this work. Top: full view. Bottom: focused view.

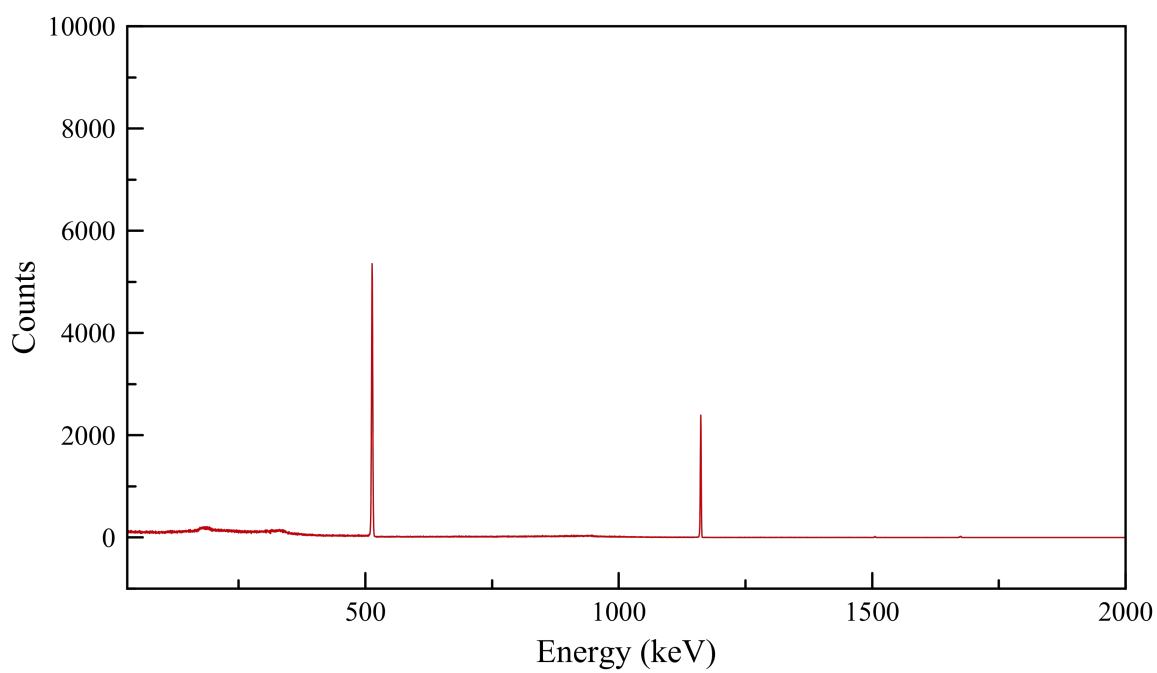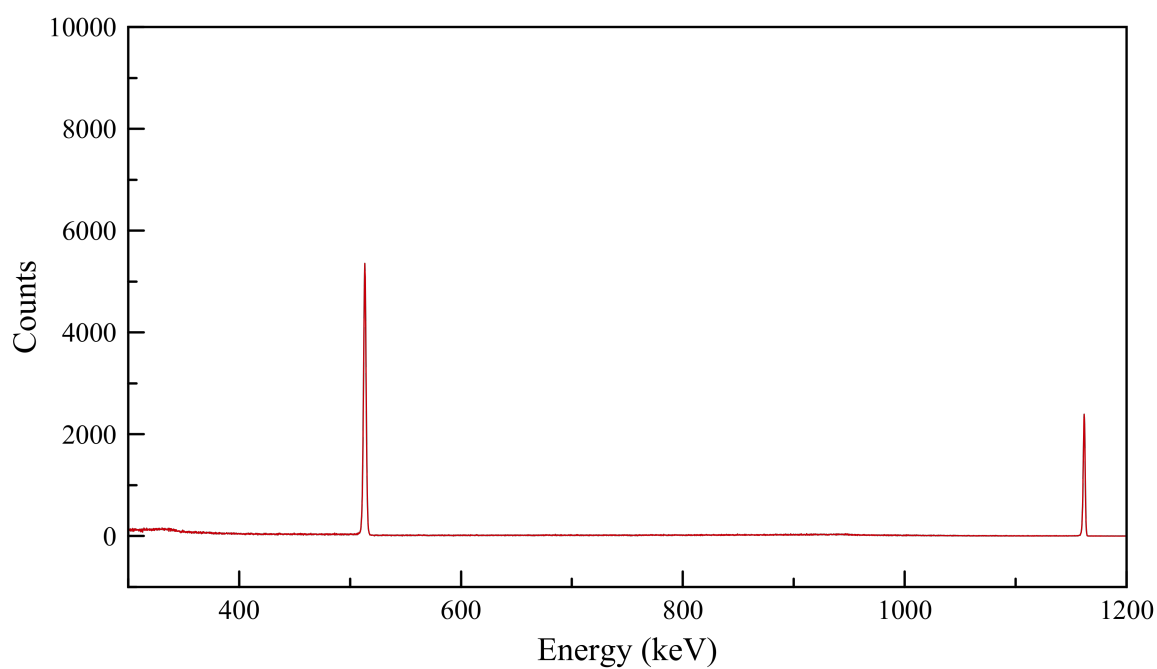

**Figure B4.** HPGe gamma-ray spectra of  $^{44}\text{Sc}$  used in this work. Top: full view. Bottom: focused view.
